# Supplementary material for: Assessing the suitability of 8-OHdG and micronuclei as genotoxic biomarkers in chromate-exposed workers: a cross-sectional study
Source: PubMed Central journal article supplement — BMJ Open. 2014 Oct 9;4(10):e005979. doi: 10.1136/bmjopen-2014-005979 (PMC4194798; doi:10.1136/bmjopen-2014-005979), 2014-10-09
Supplement: bmjopen-2014-005979.draft_revisions.pdf [file bmjopen-2014-005979.draft_revisions.pdf]

# BMJ Open

## The suitable condition of 8-OHdG and micronucleus as genotoxic damage biomarkers in occupational chromate exposed workers

|                                 |                                                                                                                                                                                                                                                                                                                                                                                                                                                                                                                                                                                |
|---------------------------------|--------------------------------------------------------------------------------------------------------------------------------------------------------------------------------------------------------------------------------------------------------------------------------------------------------------------------------------------------------------------------------------------------------------------------------------------------------------------------------------------------------------------------------------------------------------------------------|
| Journal:                        | <i>BMJ Open</i>                                                                                                                                                                                                                                                                                                                                                                                                                                                                                                                                                                |
| Manuscript ID:                  | bmjopen-2014-005979                                                                                                                                                                                                                                                                                                                                                                                                                                                                                                                                                            |
| Article Type:                   | Research                                                                                                                                                                                                                                                                                                                                                                                                                                                                                                                                                                       |
| Date Submitted by the Author:   | 27-Jun-2014                                                                                                                                                                                                                                                                                                                                                                                                                                                                                                                                                                    |
| Complete List of Authors:       | Li, Ping; Peking university, Department of Occupational and Environmental Health Science<br>Gu, Yongen; Peking university, Department of Occupational and Environmental Health Science<br>Yu, Shanfa; Institute of Occupational Medicine, Department of Occupational Health Science<br>Li, Yang; Peking university, Department of Occupational and Environmental Health Science<br>Yang, Jinglin; Peking university, Department of Occupational and Environmental Health Science<br>Jia, Guang; Peking university, Department of Occupational and Environmental Health Science |
| <b>Primary Subject Heading</b>: | Public health                                                                                                                                                                                                                                                                                                                                                                                                                                                                                                                                                                  |
| Secondary Subject Heading:      | Occupational and environmental medicine                                                                                                                                                                                                                                                                                                                                                                                                                                                                                                                                        |
| Keywords:                       | Occupational dermatology < DERMATOLOGY, Risk management < HEALTH SERVICES ADMINISTRATION & MANAGEMENT, Epidemiology < THORACIC MEDICINE                                                                                                                                                                                                                                                                                                                                                                                                                                        |
|                                 |                                                                                                                                                                                                                                                                                                                                                                                                                                                                                                                                                                                |

SCHOLARONE™  
Manuscripts

1  
2  
3  
4  
5  
6 **The suitable condition of 8-OHdG and micronucleus as genotoxic**  
7  
8 **damage biomarkers in occupational chromate exposed workers**  
9  
10

11  
12  
13  
14  
15 Ping Li<sup>1</sup>, Yongen Gu\*<sup>1</sup>, Shanfa Yu<sup>2</sup>, Yang Li<sup>1</sup>, Jinglin Yang<sup>1</sup>, Guang Jia<sup>1</sup>  
16

17 \* co-author: equally with the first author  
18  
19  
20  
21  
22  
23  
24  
25

26 1. Department of Occupational and Environmental Health Science, School of Public  
27 Health, Peking University, Beijing 100191, P. R. China  
28  
29

30  
31  
32 2. Department of Occupational Health Science, Institute of Occupational Medicine,  
33 Zhengzhou City, Henan Province 450052, P. R. China  
34  
35  
36  
37  
38  
39  
40  
41  
42

43 Address correspondence to:  
44

45 Department of Occupational and Environmental Health Science, School of Public  
46 Health, Peking University, Beijing 100191, P. R. China  
47

48 Tel: +86-010-8280-2333, Fax: +86-010-8280-2333  
49

50 E-mail: [jiaguangjia@bjmu.edu.cn](mailto:jiaguangjia@bjmu.edu.cn)  
51  
52  
53  
54  
55  
56  
57  
58  
59  
60

## Abstract

**Objectives:** We aimed to investigate the suitable condition of 8-hydroxy-2'-deoxyguanosine (8-OHdG) and micronucleus(MN) at different levels of occupational chromate exposure.

**Design:** A cross-sectional study was used.

**Participants:** 84 workers exposing chromate at least one year were chosen as exposed group, while 30 non-exposed individuals were used as controls.

**Main outcome measures:** Environmental and biological exposure of chromate was assessed respectively by measuring the concentration of chromate in the air (CrA) and blood (CrB) by ICP-MS in all subjects. CBMN was conducted, in which many indexes including MNCC, MNC, NPB and NBUD were calculated, while the urinary 8-OHdG was measured by ELISA method and normalized by the concentration of Cre.

**Results:** Compared with the control group, the levels of CrA, CrB, MNCC, MNC and 8-OHdG in chromate exposed group were all significantly higher ( $P<0.05$ ). There was a positive correlation between  $\log(8\text{-OHdG})$  and  $\text{LnMNCC}$  or  $\text{LnMNC}$  ( $r=0.377$  and  $r=0.362$ ). The levels of  $\text{LnMNCC}$ ,  $\text{LnMNC}$  and  $\text{Log}(8\text{-OHdG})$  did not have the simple linear relationship with the concentration of CrB. There was a significantly positive correlation between  $\text{Log}(8\text{-OHdG})$  and CrB when CrB level was below  $10.50\text{ ug/L}$  ( $r=0.355$ ). While a positive correlation was found between  $\text{LnMNCC}$  or  $\text{LnMNC}$  with CrB when CrB level was lower than  $9.10\text{ ug/L}$  ( $r=0.365$  and  $r=0.269$  respectively).

**Conclusions:** The MN and 8-OHdG can be used as the biomarker for the genetic damage in chromate exposed group, but only when CrB levels were lower than  $9.10\text{ug/L}$  and  $10.50\text{ug/L}$  respectively, they can accurately reflect the degree of genetic damage.

**Key terms:** chromate; Genetic damage; 8-OHdG; Micronucleus, Concentration of chromate in the blood

**Abbreviation:**

Cytokinesis-block micronucleus test-----CBMN

Micronuclei cell count -----MNCC

Micronucleus count -----MNC

Nuclear bridge-----NPB

Nuclear bud -----NBUD

Creatinine-----Cre

***Strengths and limitations of this study(Article summary)***

Strengths: All our results had provided new insight that only when the concentration of CrB was lower than 9.10ug/L and 10.45ug/L respectively, the MN and 8-OHdG can be used as the effective biomarkers to show the degree of genetic damage for the chromate occupational exposure, otherwise, above these levels, the cytotoxic effects might play an important role and the fate of cells with serious genetic damages may turn into apoptosis or necrosis, consequently which could lead to the false appearance of lower degree of MN and 8-OHdG at higher chromate exposed level.

Limitations: the size of this study population was not very large, especially the group of control individuals, so we chose some references to give the normal value of MN and 8-OHdG in other controls to reduce the mitigation of bias. In this research, we got the recommended condition of 8-OHdG and MN as genetic damage biomarker in chromate exposed group. It is necessary that more occupational epidemiological survey in different chromate producing factories should be chosen to verify this conclusion.

## ***Introduction***

Chromate is a widely used chemical in industrial and agricultural production in china, which could generate many pollutants including the waste water, waste gas and waste residue in chromate production, usage, transportation and storage. Long-term chromate exposure in occupational workplace can affect the health status of workers even cancer, so it has been declared as a well-known environmental and occupational hazards.

There are many different valences of chromate, in which the hexavalent chromate (Cr-VI) is the most harmful one. Cr-VI can enter human body mainly by inhalation during occupational activities. When entering into respiratory system (nose, bronchial and lung), some Cr-VI could be converted to Cr-V, Cr-IV and Cr-III, and accumulated in bronco-alveolar lining fluid, mucosa and pulmonary tissues<sup>1,2</sup>. This transformation also can consequently form many reactive intermediates with oxidative stress<sup>3,4</sup>. Both Cr-III and ROS could contribute to interact with various proteins, DNA and other biological macromolecule to cause damage on DNA and chromosome, which can initiate carcinogenesis if accumulated to some degree<sup>5,6,7</sup>.

Based on the evidence above, 8-OHdG as a product of oxidative DNA damage, can be used to assess the oxidative damage and DNA mutations that are induced by the ROS in clinical<sup>8</sup>, environmental<sup>9,10</sup> and occupational setting in vitro<sup>11,12</sup> or in cell cultures<sup>13</sup>. MN in peripheral blood originates from chromosome fragments that are attacked by certain physical and chemical factors such as chromium or whole chromosomes that lag behind at anaphase during nuclear division. When the excision-repairable DNA lesions induced in G0/G1 phase, they can be converted to MN by using inhibitors of the gap filling step of excision repairmen, so that unfilled gaps are converted to double strand breaks after S phase<sup>14</sup>, so the frequency of MN can be used to reflect the genetic damage<sup>15</sup>. The CBMN test is a common method to detect the MN frequencies including many indexes such as MNCC, MNC, NPB and NBUD. In these indexes, MNCC and MNC were commonly used to detect the DNA damage<sup>14</sup>.

1  
2  
3  
4  
5  
6  
7  
8  
9  
10  
11  
12  
13  
14  
15  
16  
17  
18  
19  
20  
21  
22  
23  
24  
25  
26  
27  
28  
29  
30  
31  
32  
33  
34  
35  
36  
37  
38  
39  
40  
41  
42  
43  
44  
45  
46  
47  
48  
49  
50  
51  
52  
53  
54  
55  
56  
57  
58  
59  
60

Previous studies have chose the relationship between CrB and urinary 8-OHdG or MN to discuss the feasibility of 8-OHdG and MN as the biomarker for chromium exposure, however, the conclusion about this connection have yielded conflicting results: Kuo found the linear correlation between urinary 8-OHdG and CrB<sup>16</sup>, but Gao, Kim and Zhang didn't confirm it subsequently<sup>17,18,19</sup>, many studies had been identified there was some association between CrB and MN frequencies<sup>20,21,22</sup>, but the suitable conditions and limitations for 8-OHdG and MN as biomarkers for occupational chromate exposure have still been unclear.

So our researches aimed to observe the effect of chromate exposure on genetic damage in occupational workers, especially urinary 8-OHdG for the oxidative DNA damage and MN for chromosome damage. Then it was discussed whether MN frequency and 8-OHdG can be used as the effective genotoxic biomarkers at different levels of chromate exposure.

## ***Materials and methods***

### ***Study design and population***

A cross-sectional survey was designed for this research. The factory was chosen as the work place in Henan province in china because (1) the product--potassium dichromate was relatively simple, most of which was water-soluble hexavalent chromate. (2) Annual health check-ups were offered in this factory for workers, which allowed us to easily collect specimens from workers to minimize the interference with normal work schedules.

In this research, 84 workers exposed to chromate in the factory were chosen as exposed group, while 30 non-exposed individuals working in the administration office were as control group. The criteria of subjects included: (1) workers in exposed group were at least one year employment and 3 months working in the same work position. (2) aged between 25-50. (3) no medical history of allergy, asthma or allergic rhinitis, (4) all subjects with skin infections, fever or other clinical diseases should be excluded during the sampling period. (5) Pregnant and nursing women were not

1  
2  
3 enrolled. .  
4

5 All subjects were in the same factory with similar education and social  
6 backgrounds. They all were requested to complete a questionnaire and had a clinical  
7 examination. The questionnaire included a lot of information including occupational  
8 history, personal medical history, medication used in 4 weeks before the study, body  
9 weight and height, hair dye, house decoration, radiation exposure, individual  
10 protection, smoking status and alcohol intake.  
11  
12  
13  
14  
15

### 16 17 ***Ethical consideration*** 18

19 This study was approved by Medical Ethics Committee of Peking University,  
20 Health Science Center (HSC), Beijing, China. Written informed consent from each  
21 study subject was also obtained.  
22  
23

### 24 25 ***Air and Biological exposure assessment*** 26

27 Six air sampling sections were respectively chosen in the workplaces of two  
28 groups, 10 sampling points were chosen in each section. The sampling process was  
29 used pumping at 1L/min for 8 hours (Sp730, TSI Corporation, USA), the membranes  
30 used in this study were MCE mixed cellulose ester filters ( $\Phi$ 37mm, pall,  
31 America).The average concentration of all sampling points on the membranes in the  
32 same group was measured by atomic absorption spectrometry and then calculated to  
33 evaluate the CrA during the whole production process, the detection limit for the CrA  
34 was 0.001  $\mu$ g/L.  
35  
36  
37  
38  
39  
40  
41

42 2ml anticoagulant (EDTA and heparin) blood in peripheral was drew from each  
43 subject after finishing the questionnaire and then assigned to two tubes on average.  
44 They were respectively used to measure the CrB and CBMN. The concentration of  
45 CrB was measured by inductively coupled plasma mass spectrometer (ICP-MS)<sup>26</sup>. the  
46 detection limits was 0.0012  $\mu$ g/L. The tubes used above had been detected their  
47 background value before research to ensure less elements and heavy metals  
48 contamination. .  
49  
50  
51  
52  
53  
54

55 At the end of the work-shift, 30mL urine sample of each subject was collected  
56 into a 50 mL metal-free polypropylene centrifuge tube (Falcon, BD Biosciences) and  
57  
58  
59  
60

1  
2  
3 stored at  $-80^{\circ}\text{C}$  until used to measure the contents of 8-OHdG and Cre.  
4  
5

### 6 ***Determination of urinary 8-OHdG***

7  
8 According to the manufacturer's instructions, urine samples were firstly  
9 centrifuged at 1500 rpm for 7 min, secondly the supernatant was chosen to determine  
10 the content of urinary 8-OHdG using ELISA kit (USA Cayman chem, USA Cayman  
11 chem, 8-OHdG EIA kit) by Multiskan MK3 (Thermo, USA) and Cre by alkaline  
12 picric acid assay with a commercial kit (Ausbio Laboratories Co., Ltd. China) using a  
13 Hitachi 7170A automatic analyzer (Hitachi Corp, Japan). The results of 8-OHdG were  
14 regulated by Cre to avoid the potential interference of different urine density among  
15 the subjects.  
16  
17  
18  
19  
20  
21  
22

### 23 ***CBMN test***

24  
25 Peripheral venous blood which was designed in heparinized tubes with individual  
26 numbers was taken to measure the MN frequency. The indexes (MNCC, MNC, NPB  
27 and NBUD) were counted in 1000 binuclear lymphocytes of each individual  
28 according to Fenech's protocol<sup>23</sup>. All scoring was carried out by two independent  
29 researchers through double - blind method. If the result from these two researchers  
30 was different, another researcher should be asked to verify the scores.  
31  
32  
33  
34  
35  
36

### 37 ***Statistical analysis***

38  
39 Epidata 3.0 software was used to entry the questionnaire and experimental data  
40 into computer. The whole process was utilized double-entry and logistical error check  
41 to ensure the accuracy.  
42  
43  
44

45 All analysis was performed with SPSS16.0. Normality was assessed by  
46 Kolmogorov-Smirnov (*K-S*) test, the variables including 8-OHdG, MNCC and MNC  
47 did not meet the normality, so Log or Ln transformation was made for normality  
48 approximation. Continuous and categorical parameters between chromate exposed  
49 group and control group were tested using the two sample *t* test (or Mann-Whitney U  
50 nonparametric test) and  $\chi^2$  test. Curving correlation and linear regression were  
51 performed. Statistical significance was for two-sided. The *P* values were defined as  
52  $\alpha < 0.05$ .  
53  
54  
55  
56  
57  
58  
59  
60



## Results

### General information analysis

A total of 114 subjects including 84 chromate exposed workers (mainly in form of  $K_2Cr_2O_7$ ) and 30 controls were recruited in this study. The working age of chromate exposed group was  $(7.82 \pm 5.51)$  years. Furthermore, the personal protection (gloves and masks) of workers was above 90%. The demographic characteristics of all subjects in this research were presented in Table 1, which showed that there were no significant differences in the distribution of gender, age, smoking and alcohol consumption between the two groups.

**Table 1 General information of chromate exposed group and control group**

| Group                | Exposed group<br>(n=84) | Control group<br>(n=30) | T                 | $\chi^2$ | P      |
|----------------------|-------------------------|-------------------------|-------------------|----------|--------|
| Age                  | $\bar{X} \pm S$         | 35.73 $\pm$ 7.85        | 34.83 $\pm$ 8.83  | 0.432    | 0.666  |
| ≤35                  | n (%)                   | 40 (47.62)              | 17 (56.67)        | 0.187    | 0.493  |
| >35                  |                         | 44 (52.38)              | 13 (43.33)        |          |        |
| Gender               | n (%)                   |                         |                   | 0.869    | 0.351  |
| Male                 |                         | 62 (73.81)              | 19 (63.33)        |          |        |
| Female               |                         | 22 (26.19)              | 11 (36.67)        |          |        |
| Smoke                | n (%)                   |                         |                   | 0.610    | 0.435  |
| Yes                  |                         | 30 (35.71)              | 8 (26.67)         |          |        |
| No                   |                         | 54 (64.29)              | 22 (73.33)        |          |        |
| Alcohol              | n (%)                   |                         |                   | 2.530    | 0.092  |
| Yes                  |                         | 29 (34.52)              | 16 (53.33)        |          |        |
| No                   |                         | 55 (65.48)              | 9 (46.67)         |          |        |
| 8-OHdG<br>(ug/g Cre) | $\bar{X} \pm S$         | 43.76 $\pm$ 34.89       | 27.21 $\pm$ 13.76 | 3.354    | <0.001 |
| MNCC (‰)             | M(Q)                    | 6.00 (4.00)             | 3.20 (2.10)       | 2.420    | 0.004  |
| MNC (‰)              | M(Q)                    | 7.40 (4.47)             | 3.74 (2.94)       | 3.401    | 0.001  |
| NBUD (‰)             | M(Q)                    | 1.11 (1.20)             | 1.16 (1.17)       | 0.163    | 0.871  |
| NPB (‰)              | M(Q)                    | 1.28 (1.15)             | 1.42 (1.34)       | 0.476    | 0.635  |

Note: Smoking referred to suck at least one cigar per day and last one year or more, smoking quit but less than one year was also included. Alcohol was definitive by weekly drinking no less than three times

### Concentration of CrA and CrB

As was shown in Figure 1, the concentration of CrA in chromate exposed group

1  
2  
3 [(15.45 ± 19.00) µg/m<sup>3</sup>] was much higher than that in control group [(0.23 ± 0.38)  
4 µg/m<sup>3</sup>](*P*<0.001), but still under the exposure limitation of chromate  
5 [(50µg/m<sup>3</sup>)(2012, ACGIH)]. The levels of CrB in chromate exposed group [(9.45 ±  
6 9.47) µg/L] were also significantly higher than that in control group [(4.05 ± 1.87)  
7 µg/L] (*P*<0.001).  
8  
9

### 10 11 12 ***Levels of urinary 8-OHdG, and serum CBMN indexes***

13  
14  
15 As for the data distribution of indexes such as 8-OHdG, MNCC, MNC, NBUD and  
16 NPB (Table 1), there were three kinds of indexes (8-OHdG, MNCC and MNC) . They  
17 were higher in chromate exposed group than that in control group (*P*<0.05), which  
18 showed that 8-OHdG, MNCC and MNC could be used as the genetic damage  
19 biomarkers feasibly caused by chromate exposure.  
20  
21

### 22 23 24 ***Correlation***

25  
26 As two biomarkers for genetic damage, there was a positive correlation between  
27 log (urinary 8-OHdG) and LnMNCC and LnMNC (*r*=0.377 and *r*=0.362 respectively)  
28 *P*<0.05)(Figure 2).  
29  
30

31  
32 Correlation was analyzed between the concentration of urinary 8-OHdG and CrB.  
33 As was recorded in Figure 3, there was no linear correlation but a curve fitting  
34 between CrB and Log (8-OHdG), we found the value of 8-OHdG was decreased when  
35 the concentration of CrB was more than 10.50µg/L. Based on the results above, the  
36 concentration of CrB was stratified into two groups: the high exposed group (CrB  
37 ≥10.50µg/L) and the low exposed group (CrB <10.50µg/L). A positive correlation  
38 was shown between CrB and log (8-OHdG) when the CrB Level was lower  
39 than10.50µg/L (*r*=0.355, *P*<0.05), while there was a negative correlation between CrB  
40 and log (8-OHdG) when the CrB Level was higher than10.50µg/L.  
41  
42

43  
44 The relationship between the concentration of MNCC or MNC and CrB was also  
45 analyzed in this research (Figure 4). there were no linear correlation but a curve fitting  
46 between CrB and LnMNCC or LnMNC. We found the value of MNCC or MNC was  
47 decreased when the concentration of CrB was more than 9.10µg/L. Based on the  
48 results above, the concentration of CrB was stratified into two groups: the high  
49  
50  
51  
52  
53  
54  
55  
56  
57  
58  
59  
60

1  
2  
3 exposed group (CrB  $\geq 9.10 \mu\text{g/L}$ ) and the low exposed group (CrB  $< 9.10 \mu\text{g/L}$ ). A  
4  
5 positive correlation was shown between CrB and LnMNCC or LnMNC in higher  
6  
7 chromate exposed group ( $r=0.365$  and  $r=0.269$  respectively,  $P<0.05$ ), while a  
8  
9 significantly negative relationship was found between CrB and LnMNCC or LnMNC  
10  
11 in the lower chromate exposed group. ( $r=-0.279$  and  $r=-0.261$  respectively,  $P<0.05$ ).  
12  
13

## 14 15 16 17 **Discussion**

18  
19 Long-term and low level chromate exposure can not only increase the body's  
20  
21 internal load but also cause a variety of harmful effects on workers' health even  
22  
23 increase the incidence of human cancer<sup>24,25</sup>. In occupational activity, chromate could  
24  
25 enter into workers' body mainly by respiratory system, then be metabolism and  
26  
27 excreted by urine, so our previous researches have proved the concentration of  
28  
29 chromium in whole blood and urine can be used as the indicators to assess chromate  
30  
31 biological exposure<sup>6,26</sup>. In this study, it was found that the concentrations of CrA and  
32  
33 CrB in exposed group were all significantly higher than that in control group  
34  
35 ( $P<0.05$ ), while the CrB level in chromate exposed group was nine times more than  
36  
37 that in the general population of our country ( $1.19 \mu\text{g/L}$ )<sup>27</sup>, which showed that the  
38  
39 conclusion was credible by contrasting the genetic damage indexes between chromate  
40  
41 exposed group and control group.

42  
43 As we all known when Cr-VI enters human blood, it will be converted into other  
44  
45 valence chromate compounds such as Cr-III, which could not only produce a large  
46  
47 amount of ROS that can cause the redox system imbalance, but also directly or  
48  
49 indirectly coordinate with DNA or protein. The transformation above can affect  
50  
51 genetic stability including oxidative DNA lesion, DNA cross-links, single and double  
52  
53 strand breaks and so on<sup>28,29,30</sup>. Besides, long-term chromate exposure can also cause  
54  
55 cyto-toxicity to lead cells apoptosis<sup>31</sup>.

56  
57 Urinary 8-OHdG has been demonstrated as a biomarker for oxidative DNA  
58  
59 damage in chromate exposure not only by animal experiment but also by many  
60

1  
2  
3 epidemiological researches<sup>32,33</sup>, because it is the site that ROS often attacks, but the  
4  
5 dose-response relationship with occupational exposure indicators was not depicted  
6  
7 clearly. Overall, in this research, the relationship between urinary 8-OHdG and CrB  
8  
9 was two-way changes. The concentration of urinary 8-OHdG was not significantly  
10  
11 increasing when the level of CrB is more than 10.50µg/L, which showed that when  
12  
13 the CrB was higher than some degree, the concentration of urinary 8-OHdG would  
14  
15 fail to predict the degree of DNA damage. There are some reasons for this result,  
16  
17 firstly Sumner E.R has proved that oxidative DNA damage by chromate exposure  
18  
19 mainly target on specifically certain glycolytic enzymes on 8-OHdG<sup>34</sup>, which means  
20  
21 once higher burden of CrB was produced, it could oxidize and change the structure of  
22  
23 glycolytic enzymes to reduce the production of free 8-OHdG. secondly, some  
24  
25 researchers have proved that 8-OHdG was not the final product of redox reaction, so  
26  
27 when the level of CrB is higher, 8-OHdG could be converted to these further  
28  
29 oxidation products such as Spiroiminodihydantoin (Sp)<sup>35</sup>, so the concentration of free  
30  
31 8-OHdG was reduced. Thirdly, as we all know, the kidney can be damaged by chronic  
32  
33 chromate exposure. As the level of CrB increased, the kidney was at greater health  
34  
35 risk, which ultimately affect the exertion of 8-OHdG in urine<sup>36</sup>.

36  
37 Micronuclei is another biomarker which commonly used as the genetic damage of  
38  
39 chromate exposure<sup>37,38</sup>. Many researches showed that chromate exposure could cause  
40  
41 the increasing of MN frequency in cell research, animals experiment, and human  
42  
43 being<sup>39,40</sup>. In this research, the similar conclusion was proved that the MN frequency  
44  
45 was significantly higher in chromate exposed group than that in control group and  
46  
47 the general population<sup>41</sup>( $P<0.05$ ). The frequency of MNCC and MNC (as the  
48  
49 sensitive indexes of MN) has statistical differences between these two groups.  
50  
51 However, the dose-response relationship with CrB still needs many further  
52  
53 investigations, so this research was meaningful to discuss the suitable condition of  
54  
55 MN as genetic damage. In this study, no linear correlation was shown between CrB  
56  
57 and LnMNCC or LnMNC, the MN frequency did not increase as the CrB elevated.  
58  
59 When all subjects were divided into two subgroups by the concentration of CrB, a  
60  
61 positive correlation was shown between CrB and LnMNCC and LnMNC in high CrB

1  
2  
3  
4  
5  
6  
7  
8  
9  
10  
11  
12  
13  
14  
15  
16  
17  
18  
19  
20  
21  
22  
23  
24  
25  
26  
27  
28  
29  
30  
31  
32  
33  
34  
35  
36  
37  
38  
39  
40  
41  
42  
43  
44  
45  
46  
47  
48  
49  
50  
51  
52  
53  
54  
55  
56  
57  
58  
59  
60

group( $\text{CrB} \geq 9.10 \mu\text{g/L}$ ) ( $r=0.365$  and  $r=0.269$  respectively), while a significantly inverse relationship was found between CrB with LnMNCC and LnMNC in low CrB group( $\text{CrB} < 9.10 \mu\text{g/L}$ ) ( $r=-0.279$  and  $r=-0.261$  respectively). The reason for these results may be that the occupational chromate exposure can increase the frequency of the MN in some range. As the increasing of CrB, more serious genotoxic damage should be caused such as the apoptosis or necrosis of lymphocyte, which contrarily decrease the frequency of MN in this situation<sup>42,43</sup>.

Both MN and urinary 8-OHdG can be used to predict different types of DNA damage. A positive correlation between urinary 8-OHdG and MN was found, which suggested that these two indicators as genetic damage biomarker can be verified each other.

### ***Conclusions***

All these above had provided new insight that both MN and urinary 8-OHdG can be used as the genetic damage biomarkers caused by occupational chromate exposure at some level, the combination of these indicators can improve the credibility of the results. It is not the simple linear relationship between their concentration and the level of chromate exposure. Only when the level of CrB is below  $9.10 \mu\text{g/L}$  and  $10.50 \mu\text{g/L}$ , the MN frequency and urinary 8-OHdG can show the degree of genetic damage respectively produced by chromate exposure quantitatively.

### ***Contributor ship statement***

All the authors included in the paper grant the criteria of the authorship. PL together with YG conceived and executed this investigation, analyzed of the data and described this manuscript. YL and JY supported this investigation from the epidemiological aspect. GJ is responsible for the whole conduct of this study and all

1  
2  
3 content of this. SFY contribute to the organization and arrangement for the scene  
4  
5 investigation. All authors commented critically on the manuscript and agreed with this  
6  
7 submitting.  
8  
9

### 10 11 ***Competing interests*** 12

13 There are not competing interests.  
14  
15

### 16 17 ***Funding*** 18

19 This work was supported by the project of National Natural Science Foundation  
20 of china [81073043 and 81072281] and the Doctor Fund of Ministry of Education of  
21 china(20120001110103).  
22  
23  
24  
25  
26  
27

### 28 29 ***Data sharing*** 30

31 There is not data sharing.  
32  
33  
34  
35  
36  
37

### 38 39 **Reference** 40

- 41 1. Monika Gube, Joachim Ebel, Peter Brand, et al. Biological effect markers in exhaled breath  
42 condensate and biomonitoring in welders: impact of smoking and protection equipment[J]. Int  
43 Arch Occup Environ Health, 2010, 83 (7): 803 - 811.
- 44 2. Andrea Caglieri, Matteo Goldoni, Olga Acampa, et al. The effect of inhaled chromium on  
45 different exhaled breath condensate biomarkers among chrome-plating workers[J].  
46 Environmental Health Perspectives, 2006, 114 (4): 542-546.
- 47 3. Shrivastava Richa, Upreti RK, Seth PK, et al. Effects of chromium on the immune system[J].  
48 Immunology and Medical Microbiology, 2002, 34 (4): 1-7.
- 49 4. Shashwat Katiyar, Awasthi SK, Srivastava JK. Effect of chromium on the level of IL-12 and  
50 IFN-  $\gamma$  in occupationally exposed workers[J]. Science of the total environment, 2009, 407 (6):  
51 1868-1874.
- 52 5. Mohammad BH, Marie Vahter, Gabriela Concha, et al. Low level environmental cadmium  
53 exposure is associated with DNA hypomethylation in argentinean women[J]. Environmental  
54 Health Perspectives, 2012, 120 (6): 879 - 884.
- 55 6. Xiaohua L, Yanshuang S, Li W, Yuhui L, Ji Z, Yanhui M, Yun W, Wenjun M, Lei Y, Guang J.  
56 Evaluation of the correction between genetic damage and occupational chromate exposure  
57 through BMMN frequenciess[J]. J Occup Environ Med 2012, 54(2):166-170.
- 58 7. De Flora S, Bagnasco M, Serra D, et al. Genotoxicity of chromium compounds: A review[J].  
59 Mutation Research/Reviews in Genetic Toxicology, 1990, 238 (5): 99-172.
- 60 8. Wu LL, Chiou C-C, Chang P-Y, et al. Urinary 8-OHdG: a marker of oxidative stress to DNA

- and a risk factor for cancer, atherosclerosis and diabetics[J]. *Clinica Chimica Acta*, 2004, 339 (1-2): 1-9.
9. Ren C, Fang S, Wright RO, et al. Urinary 8-hydroxy-2-deoxyguanosine as a biomarker of oxidative DNA damage induced by ambient pollution in the Normative Aging Study[J]. *Occupational and environmental medicine*, 2011, 68 (2): 562-569.
  10. Lin CY, Lee HL, Chen YC, et al. Positive association between urinary levels of 8-hydroxydeoxyguanosine and the acrylamide metabolite N-acetyl-S-(propionamide)-cysteine in adolescents and young adults[J]. *J Hazard Mater*, 2013, 261: 372-377.
  11. Kim JY, Mukherjee S, Ngo LC, et al. Urinary 8-hydroxy-2'-deoxyguanosine as a biomarker of oxidative DNA damage in workers exposed to fine particulates[J]. *Environmental health perspectives*, 2004, 112 (6): 666-671.
  12. Valavanidis A, Loridas S, Vlahogianni T, et al. Influence of ozone on traffic-related particulate matter on the generation of hydroxyl radicals through a heterogeneous synergistic effect[J]. *J Hazard Mater*. 2009, 162 (2-3): 886-892.
  13. Valavanidis A, Vlachogianni T, Fiotakis C. 8-hydroxy-2-deoxyguanosine (8-OHdG): a critical biomarker of oxidative stress and carcinogenesis[J]. *Journal of environmental science and health Part C*, 2009, 27 (2): 120-139.
  14. M. Fenech, M. Kirsch-Volders, A. T. Natarajan, et al. Molecular mechanisms of micronucleus, nucleoplasmic bridge and nuclear bud formation in mammalian and human cells. *Mutagenesis* vol, 2011, 26: 125 - 132.
  15. Sobol Z, Schiestl RH. Intracellular and extracellular factors influencing Cr (VI) and Cr (III) genotoxicity[J]. *Environmental and Molecular Mutagenesis*, 2012. 53 (2): 94-100.
  16. Kuo H, Chang S, Wu K, et al. Chromium (VI) induced oxidative damage to DNA: increase of urinary 8-hydroxydeoxyguanosine concentrations (8-OHdG) among electroplating workers[J]. *Occupational and environmental medicine*, 2003, 60 (8): 590-594.
  17. Kim H, Cho S-H, Chung M-H. Exposure to hexavalent chromium does not increase 8-hydroxydeoxyguanosine levels in Korean chromate pigment workers[J]. *Industrial health*, 1999, 37 (3): 335-341.
  18. Gao M, Levy LS, Faux SP, et al. Use of molecular epidemiological techniques in a pilot study on workers exposed to chromium[J]. *Occupational and environmental medicine*, 1994, 51 (10): 663-668.
  19. Zhang XH, Zhang X, Wang XC, et al. Chronic occupational exposure to hexavalent chromium causes DNA damage in electroplating workers.[J] *BMC Public Health*, 2011, 11 (3): 224.
  20. Xiaohua L, Yanshuang S, Li W, et al. Evaluation of the correction between genetic damage and occupational chromate exposure through BMMN frequencies. *J Occup Environ Med* 2012, 54 (2): 166-170.
  21. Danadevi K, Rozati R, Banu BS, et al. Genotoxic evaluation of welders occupationally exposed to chromium and nickel using the Comet and micronucleus assays[J]. *Mutagenesis*, 2004, 19 (1): 35-41.
  22. Thompson CM, Fedorov Y, Brown DD, et al. Assessment of Cr (VI)-induced cytotoxicity and genotoxicity using high content analysis[J]. *PloS one*, 2012, 7 (8): 742-720.
  23. Fenech M. Cytokinesis-block micronucleus cytome assay[J]. *Nature protocols*, 2007, 2 (1): 1084-1104.
  24. Clancy HA, Sun H, Passantino L, et al. Gene expression changes in human lung cells exposed to arsenic, chromium, nickel or vanadium indicate the first steps in cancer[J]. *Metallomics*. 2012, 4(8):784-793.
  25. Chhabra D, Oda K, Jagannath P, et al. Chronic heavy metal exposure and bladder cancer risk in India, a comparative study with Japan[J]. *Asian Pacific Journal of Cancer Prevention*. 2012, 13(1): 187-190.
  26. Yan L, Jia G, Zhang J, He PP, Wang TC, Zhang N, Liu LZ, Li GR, Wang X, Wang L. The correlation between personal occupational exposure to soluble chromate and urinary chromium content. *Zhonghua yu Fang yi xue za zhi (Chinese Journal of Preventive Medicine)* 2006, 40(6): 386-389 (Article in Chinese).
  27. Ding CG, Pan Yj, Zhang AH, et al. Distribution of chromium in whole blood and urine among general population in China between year 2009 and 2010. *Zhonghua yu Fang yi xue za zhi (Chinese Journal of Preventive Medicine)* 2012, 46(8): 679-682. (Article in Chinese).

- 1
- 2
- 3 28. Zhitkovich, A. Importance of chromium-DNA adducts in mutagenicity and toxicity of
- 4 chromium(VI)[J]. *Chem. Res. Toxicol.*, 2005, 18 (1): 3-11.
- 5 29. Wang TC, Song YS, Wang H, et al. Oxidative DNA damage and global DNA hypomethylation
- 6 are related to folate deficiency in chromate manufacturing workers[J]. *Journal of Hazardous*
- 7 *Materials*, 2012, 213. 214:440-446.
- 8 30. Brien, T.J.; Ceryak, S.; Patierno, S.R. Complexities of chromium carcinogenesis: role of
- 9 cellular response, repair and recovery mechanisms[J]. *Mutat. Res. Fundam. Mol. Mech.*
- 10 *Mutagen.*, 2003, 533 (14): 3-36.
- 11 31. Martini CN, Brandani JN, Gabrielli M, et al. Effect of hexavalent chromium on
- 12 proliferation and differentiation to adipocytes of 3T3-L1 fibroblasts[J]. *Toxicol In Vitro*, 2014
- 13 28(4):700-706.
- 14 32. Goulart M, Batoreu M, Rodrigues A, et al. Lipoperoxidation products and thiol antioxidants in
- 15 chromium exposed workers[J]. *Mutagenesis*, 2005, 20 (5): 311-315.
- 16 33. Khan FH, Ambreen K, Fatima G, et al. Assessment of health risks with reference to oxidative
- 17 stress and DNA damage in chromium exposed population[J]. *Science of the Total Environment*,
- 18 2012, 430 (2): 68-74.
- 19 34. Sumner ER, Shanmuganathan A, Sideri TC, et al. Oxidative protein damage causes chromium
- 20 toxicity in yeast[J]. *Microbiology*, 2005, 151: 1939-1948.
- 21 35. Steenken S, Jovanovic SV, Bietti M, et al. The trap depth (in DNA) of 8-oxo-7, 8-dihydro-2'
- 22 deoxyguanosine as derived from electron-transfer equilibria in aqueous solution[J]. *Journal of*
- 23 *the American Chemical Society*, 2000, 122 (10): 2373-2374.
- 24 36. Wang T, Jia G, Zhang J, et al. Renal Impairment Caused by Chronic Occupational Chromate
- 25 Exposure[J]. *Int Arch Occ Env Hea*, 2011, 84 (4):393 - 401.
- 26 37. Urbano AM, Ferreira LM, Alpoim MC. Molecular and cellular mechanisms of hexavalent
- 27 chromium-induced lung cancer: an updated perspective[J]. *Curr Drug Metab*, 2012, 13 (3):
- 28 284-305.
- 29 38. de Lemos CT, Rödel PM, Terra NR, et al. Evaluation of basal micronucleus frequency and
- 30 hexavalent chromium effects in fish erythrocytes[J]. *Environmental toxicology and chemistry*,
- 31 2001, 20 (6): 1320-1324.
- 32 39. Reynolds M, Armknecht S, Johnston T, et al. Undetectable role of oxidative DNA damage in
- 33 cell cycle, cytotoxic and clastogenic effects of Cr(VI) in human lung cells with restored
- 34 ascorbate levels[J]. *Mutagenesis*, 2012, 27 (4): 437-443.
- 35 40. Bagchi D, Stohs SJ, Downs BW, et al. Cytotoxicity and oxidative mechanisms of different
- 36 forms of chromium[J]. *Toxicology*, 2002, 180 (1): 5-22.
- 37 41. The HUMN and HUMN<sub>x</sub>L international collaboration projects on human micronucleus
- 38 assays in lymphocytes and buccal cells—past, present and future. *Mutagenesis*, 2011, 10 (1):
- 39 239-245.
- 40 42. Vasylykiv OY, Kubrak OI, Storey KB, et al. Cytotoxicity of chromium ions may be connected
- 41 with induction of oxidative stress[J]. *Chemosphere*, 2010, 80 (9): 1044-1049.
- 42 43. Arakawa H, Tang MS. Recognition and incision of Cr(III) ligand-conjugated DNA adducts by
- 43 the nucleotide excision repair proteins UvrABC: importance of the Cr(III)-purine moiety in the
- 44 enzymatic reaction[J]. *Chem Res Toxicol*, 2008, 21 (6): 1284-1289.
- 45
- 46
- 47
- 48
- 49
- 50
- 51
- 52
- 53
- 54
- 55
- 56
- 57
- 58
- 59
- 60



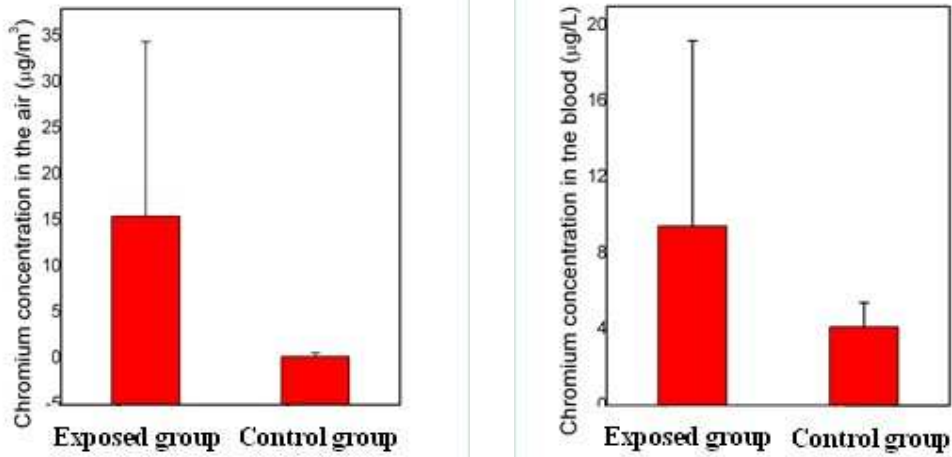

Figure1 The concentration of CrA and CrB in chromate exposed group and control group

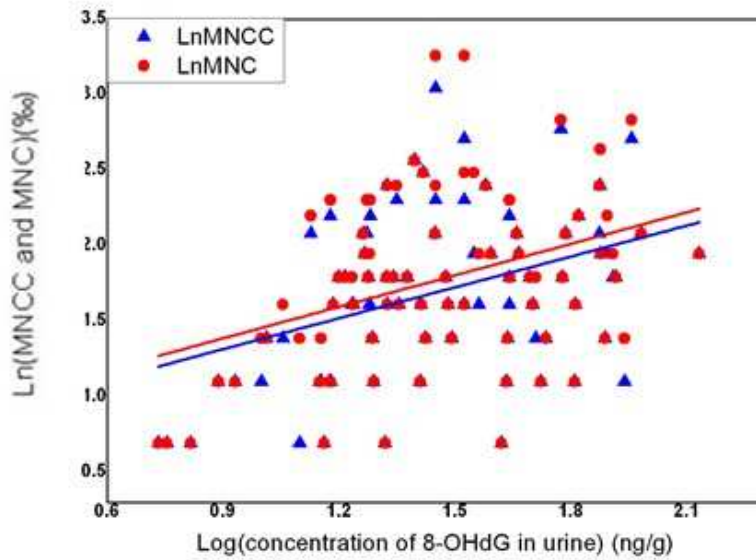

Figure 2 Correlation between MnCC and MnC with the concentration of 8-OHdG in urine in exposed group

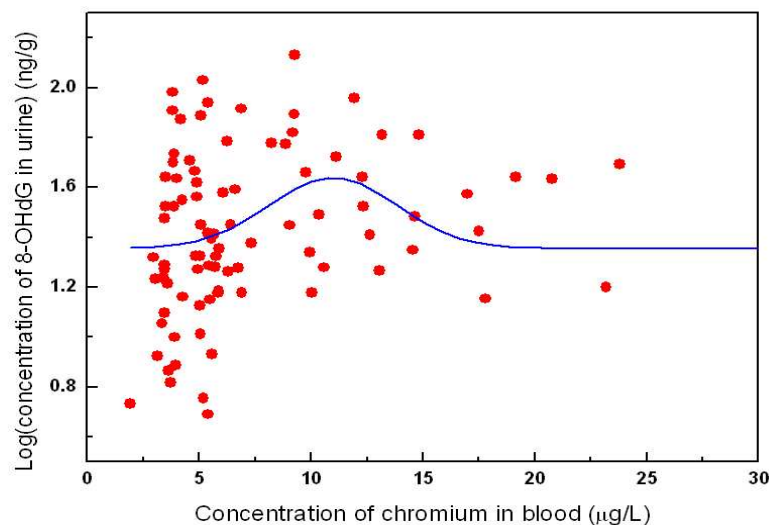

a

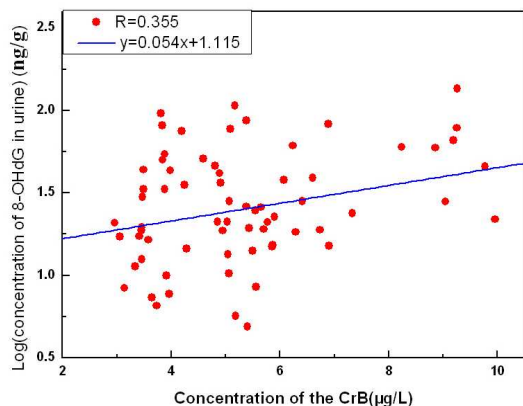

b

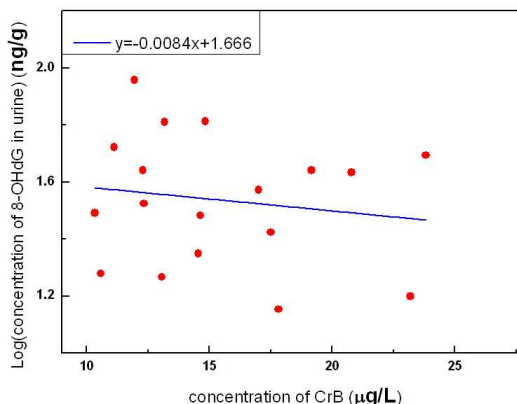

c

**Figure 3** The concentration between urinary 8-OHdG and CrB, a means the Curve fitting between urinary 8-OHdG and CrB in chromate exposed group, b means the concentration between urinary 8-OHdG and CrB in lower chromate exposed group ( $\text{CrB} < 10.50$ ), c means the concentration between urinary 8-OHdG and CrB in higher chromate exposed group ( $\text{CrB} \geq 10.50$ ).

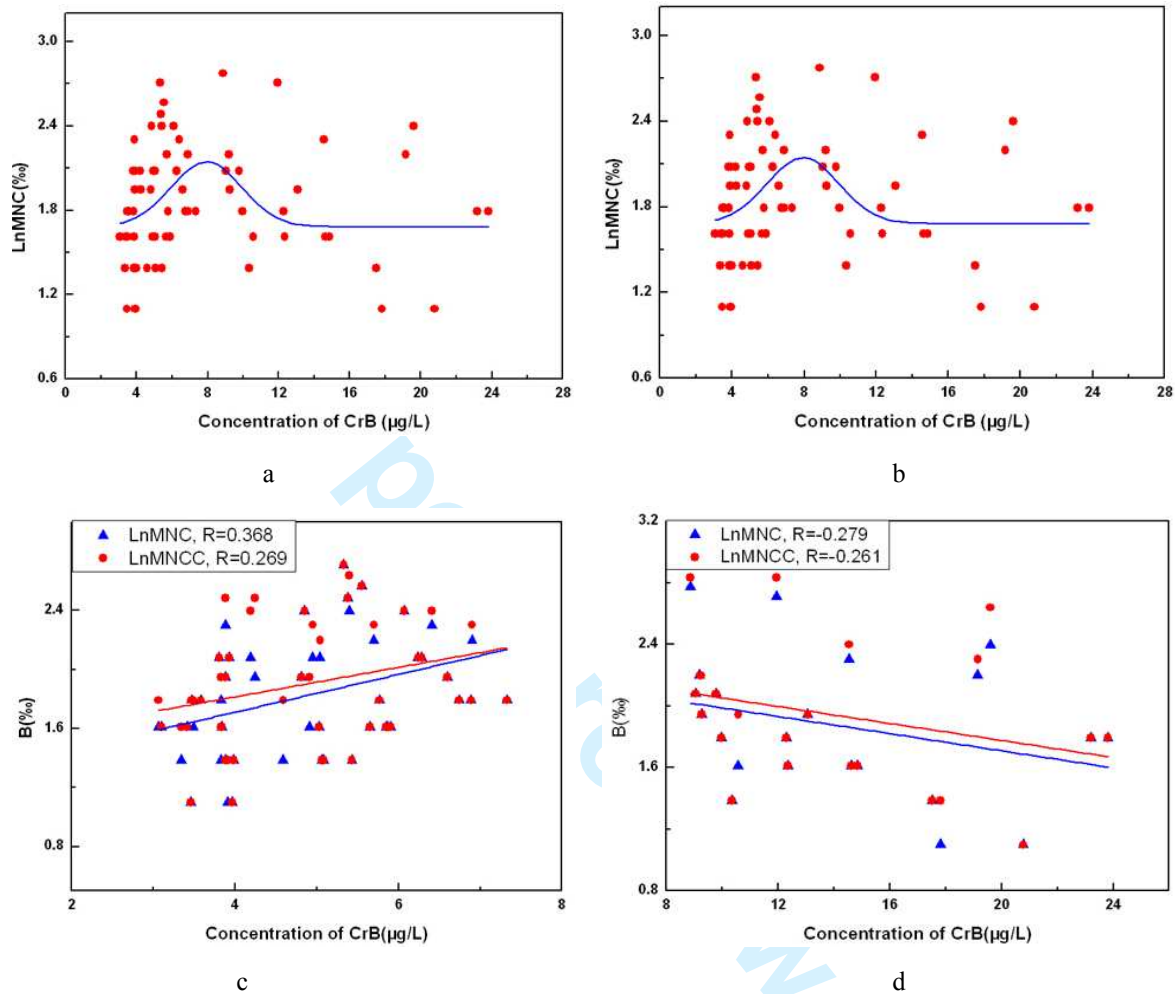

**Figure 4** The concentration between LnMNC or LnMNCC and CrB, a means the Curve fitting between LnMNC and CrB in chromate exposed group, b means the Curve fitting between LnMNCC and CrB in chromate exposed group, c means the concentration between LnMNC or LnMNCC and CrB in lower chromate exposed group ( $\text{CrB} < 9.10$ ), d means the concentration between LnMNC or LnMNCC and CrB in higher chromate exposed group ( $\text{CrB} \geq 9.10$ ).

# BMJ Open

## A cross-sectional study: the suitable condition of 8-OHdG and micronucleus as genotoxic biomarkers in chromate exposed workers

|                                 |                                                                                                                                                                                                                                                                                                                                                                                                                                                                                                                                                                                |
|---------------------------------|--------------------------------------------------------------------------------------------------------------------------------------------------------------------------------------------------------------------------------------------------------------------------------------------------------------------------------------------------------------------------------------------------------------------------------------------------------------------------------------------------------------------------------------------------------------------------------|
| Journal:                        | <i>BMJ Open</i>                                                                                                                                                                                                                                                                                                                                                                                                                                                                                                                                                                |
| Manuscript ID:                  | bmjopen-2014-005979.R1                                                                                                                                                                                                                                                                                                                                                                                                                                                                                                                                                         |
| Article Type:                   | Research                                                                                                                                                                                                                                                                                                                                                                                                                                                                                                                                                                       |
| Date Submitted by the Author:   | 27-Aug-2014                                                                                                                                                                                                                                                                                                                                                                                                                                                                                                                                                                    |
| Complete List of Authors:       | Li, Ping; Peking university, Department of Occupational and Environmental Health Science<br>Gu, Yongen; Peking university, Department of Occupational and Environmental Health Science<br>Yu, Shanfa; Institute of Occupational Medicine, Department of Occupational Health Science<br>Li, Yang; Peking university, Department of Occupational and Environmental Health Science<br>Yang, Jinglin; Peking university, Department of Occupational and Environmental Health Science<br>Jia, Guang; Peking university, Department of Occupational and Environmental Health Science |
| <b>Primary Subject Heading</b>: | Public health                                                                                                                                                                                                                                                                                                                                                                                                                                                                                                                                                                  |
| Secondary Subject Heading:      | Occupational and environmental medicine                                                                                                                                                                                                                                                                                                                                                                                                                                                                                                                                        |
| Keywords:                       | Occupational dermatology < DERMATOLOGY, Risk management < HEALTH SERVICES ADMINISTRATION & MANAGEMENT, Epidemiology < THORACIC MEDICINE                                                                                                                                                                                                                                                                                                                                                                                                                                        |
|                                 |                                                                                                                                                                                                                                                                                                                                                                                                                                                                                                                                                                                |

SCHOLARONE™  
Manuscripts

1  
2  
3  
4  
5  
6 **A cross-sectional study: the suitable condition of 8-OHdG and**  
7  
8 **micronucleus as genotoxic biomarkers in chromate exposed workers**  
9  
10

11  
12  
13  
14  
15 Ping Li<sup>1</sup>, Yongen Gu\*<sup>1</sup>, Shanfa Yu<sup>2</sup>, Yang Li<sup>1</sup>, Jinglin Yang<sup>1</sup>, Guang Jia<sup>1</sup>  
16

17 \* co-author: equally with the first author  
18  
19  
20  
21  
22  
23  
24  
25

26 1. Department of Occupational and Environmental Health Science, School of Public  
27 Health, Peking University, Beijing 100191, P. R. China  
28  
29

30  
31  
32 2. Department of Occupational Health Science, Institute of Occupational Medicine,  
33 Zhengzhou City, Henan Province 450052, P. R. China  
34  
35  
36  
37  
38  
39  
40  
41  
42

43 Address correspondence to:  
44

45 Department of Occupational and Environmental Health Science, School of Public  
46 Health, Peking University, Beijing 100191, P. R. China  
47

48 Tel: +86-010-8280-2333, Fax: +86-010-8280-2333  
49

50 E-mail: [jiaguangjia@bjmu.edu.cn](mailto:jiaguangjia@bjmu.edu.cn)  
51

52 **Key terms:** Chromate; Genotoxic; 8-hydroxy-2'-deoxyguanosine; Micronucleus;  
53 Concentration of chromate in the blood.  
54  
55  
56  
57  
58  
59  
60

## Abstract

**Objectives:** We aimed to investigate the suitable condition of 8-hydroxy-2'-deoxyguanosine (8-OHdG) and micronucleus (MN) as genotoxic biomarkers at different levels of occupational chromate exposure.

**Design:** A cross-sectional study was used.

**Participants:** 84 workers who exposed chromate at least one year were chosen as exposed group, while 30 non-exposed individuals were used as controls.

**Main outcome measures:** Environmental and biological exposure of chromate was assessed respectively by measuring the concentration of chromate in the air (CrA) and blood (CrB) by ICP-MS in all participants. CBMN including MNCC, MNC, NPB and NBUD were calculated, while the urinary 8-OHdG was measured by ELISA method and normalized by the concentration of Cre.

**Results:** Compared with the control group, the levels of CrA, CrB, MNCC, MNC and 8-OHdG in chromate exposed group were all significantly higher ( $P<0.05$ ). There was a positive correlation between  $\log(8\text{-OHdG})$  and  $\text{LnMNCC}$  or  $\text{LnMNC}$  ( $r=0.377$  and  $r=0.362$ ). The levels of  $\text{LnMNCC}$ ,  $\text{LnMNC}$  and  $\text{Log}(8\text{-OHdG})$  all have parabola correlation with the concentration of CrB. But there was a significantly positive correlation between  $\text{Log}(8\text{-OHdG})$  and CrB when CrB level was below 10.50 ug/L ( $r=0.355$ ), while a positive correlation was also found between  $\text{LnMNCC}$  or  $\text{LnMNC}$  with CrB when CrB level was lower than 9.10ug/L ( $r=0.365$  and  $r=0.269$  respectively).

**Conclusions:** The MN and 8-OHdG can be used as the genotoxic biomarkers in chromate exposed group, but only when CrB levels were lower than 9.10ug/L and 10.50ug/L respectively, they can accurately reflect the degree of genetic damage.

### ***Strengths and limitations of this study (Article summary)***

Strengths: All our results had provided new insight that only when the concentration of CrB was lower than 9.10ug/L and 10.45ug/L respectively, the MN and 8-OHdG can be used as the effective biomarkers to show the degree of genetic damage in chromate exposed group. Otherwise, when the concentration of CrB was above these levels, the cytotoxic effect might play an important role and the cells with serious genetic damage may turn into apoptosis or necrosis, consequently which could lead to the false appearance of lower degree of MN and 8-OHdG.

Limitations: the sample size of this study was not very large, especially the control group, so we chose some references to give the value of MN and 8-OHdG in normal population to reduce the generation of bias. And it is necessary that more sample size epidemiological surveys in different chromate producing factories should be chosen to verify our conclusion.

### **Abbreviation:**

Cytokinesis-block micronucleus test-----CBMN

Micronuclei cell count -----MNCC

Micronucleus count -----MNC

Nuclear bridge-----NPB

Nuclear bud -----NBUD

Creatinine-----Cre

## ***Introduction***

Chromate is a widely used chemical in industrial and agricultural production in china, which could generate many pollutants including the waste water, gas and residue in its production, usage, transportation and storage. Previous studies had proved that long-term chromate exposure in occupational workplace could affect the health status of workers even cancer, so it has been declared as a well-known environmental and occupational hazards<sup>1</sup>.

There are many different valences of chromate, in which the hexavalent chromate (Cr-VI) is the most harmful one. Cr-VI can enter human body mainly by inhalation during occupational activities. When entering into respiratory system (nose, bronchial and lung), some Cr-VI could accumulate in bronco-alveolar lining fluid, mucosa and pulmonary tissues<sup>1,2</sup> and then cross the cell membrane through non-specific phosphate/ sulfate anionic transporters to the blood. This transformation also can consequently form many reactive intermediates (Cr-V, Cr-IV and Cr-III) and reactive oxygen species (ROS) with oxidative stress<sup>3,4</sup>. Both Cr-III and ROS could contribute to interact with various biological macromolecule such as Cr-DNA adducts, Cr-protein adducts, and protein-Cr-DNA adducts. This can cause damage on DNA and chromosome including base modification, single-strand breaks and double-strand breaks. These changes can result in genetic damage and ultimate carcinogenesis if accumulated to some degree<sup>5,6,7</sup>.

Based on the evidence above, many studies have proved that 8-OHdG can be used as a biomarker to assess the oxidative damage and DNA mutations that are induced by the ROS in clinical<sup>8</sup>, environmental<sup>9,10</sup> and occupational setting in vitro<sup>11,12</sup> or in cell cultures<sup>13</sup>. MN in peripheral blood was another biomarker to show the genetic damage. It originates from chromosome fragments that are attacked by certain physical and chemical factors such as chromate or whole chromosomes that lag behind at anaphase during nuclear division. When the excision repairable DNA lesions induced in G0/G1 phase, they can be converted to MN by using inhibitors of



1  
2  
3 the gap filling step of excision repairmen, so that unfilled gaps are converted to  
4 double strand breaks after S phase<sup>14</sup>, so the frequency of MN can be used to reflect  
5 the genetic damage<sup>15</sup>. The CBMN test is a common method to detect the MN  
6 frequencies including many indexes such as MNCC, MNC, NPB and NBUD. In these  
7 indexes, MNCC and MNC were commonly used to detect the DNA damage<sup>14</sup>.  
8  
9

10  
11  
12  
13 Previous studies have discussed the relationship between CrB and urinary  
14 8-OHdG or MN in chromate exposed group to investigate the feasibility of 8-OHdG  
15 and MN as genetic damage biomarkers. However, the conclusion about this  
16 connection have yielded conflicting results: Kuo found the linear correlation between  
17 urinary 8-OHdG and CrB<sup>16</sup>, but Gao, Kim and Zhang all didn't confirm it  
18 subsequently<sup>17,18,19</sup>, some research had been identified there was some association  
19 between CrB and MN frequencies<sup>20,21,22</sup>, but the suitable conditions and limitations of  
20 8-OHdG and MN as genotoxic biomarkers for occupational chromate exposure have  
21 still been unclear So our researches aimed to observe the effect of chromate exposure  
22 on genetic damage in occupational workers, especially urinary 8-OHdG for the  
23 oxidative DNA damage and MN for chromosome damage. Then we discussed  
24 whether MN frequency and 8-OHdG can be used as the effective genotoxic  
25 biomarkers at different levels of chromate exposure.  
26  
27  
28  
29  
30  
31  
32  
33  
34  
35  
36  
37  
38  
39  
40  
41  
42  
43  
44  
45  
46  
47  
48  
49  
50  
51  
52  
53  
54  
55  
56  
57  
58  
59  
60

## ***Materials and methods***

### ***Study design and population***

A cross-sectional survey was designed for this research. The factory was chosen as the work place in Henan province in china because (1) the product--potassium dichromate was relatively simple, most of which was water-soluble hexavalent chromate. (2) Annual health check-ups were offered in this factory for workers, which allowed us to easily collect specimens to minimize the interference with normal work schedules.

In this research, 84 workers exposed to chromate in the factory were chosen as exposed group, while 30 non-exposed individuals working in the administration office were as control group. The criteria of subjects included: (1) workers in exposed group were at least one year employment and 3 months working in the same work position. (2) aged between 25-50. (3) no medical history of allergy, asthma or allergic rhinitis, (4) all subjects with skin infections, fever or other clinical diseases should be excluded during the sampling period. (5) Pregnant and nursing women were not enrolled.

All subjects were in the same factory with similar education and social backgrounds. They all were requested to complete a questionnaire and had a clinical examination before sample collection. The questionnaire included a lot of information such as occupational history, personal medical history, medication used in 4 weeks before the study, body weight and height, hair dye, house decoration, radiation exposure, individual protection, smoking status and alcohol intake.

### ***Ethical consideration***

This research was approved by Medical Ethics Committee of Peking University, Health Science Center (HSC), Beijing, China. Written informed consent from each study subject was also obtained.

### ***Air and Biological exposure assessment***

1  
2  
3  
4  
5  
6  
7  
8  
9  
10  
11  
12  
13  
14  
15  
16  
17  
18  
19  
20  
21  
22  
23  
24  
25  
26  
27  
28  
29  
30  
31  
32  
33  
34  
35  
36  
37  
38  
39  
40  
41  
42  
43  
44  
45  
46  
47  
48  
49  
50  
51  
52  
53  
54  
55  
56  
57  
58  
59  
60

According to the sampling criterion in monitoring of hazardous substances in the air (GBZ 159-2004)<sup>23</sup>, six air sampling sections were respectively chosen in the workplaces of two groups, 10 sampling points were chosen in each section. The sampling process was used pumping at 1L/min for 8 hours (Sp730, TSI Corporation, USA), the membranes used in this study were MCE mixed cellulose ester filters (Φ37mm, pall, America). The average concentration of all sampling points on the membranes in the same group was measured by atomic absorption spectrometry<sup>24</sup> and then calculated to evaluate the CrA during the whole production process; the detection limit for the CrA was 0.001 µg/L.

4ml anticoagulant (EDTA and heparin) blood in peripheral was drew from each subject after finishing the questionnaire and then assigned to these two tubes on average. They were respectively used to measure the CrB and CBMN. The concentration of CrB was measured by inductively coupled plasma mass spectrometer (ICP-MS)<sup>24</sup>. the detection limits was 0.0012 µg/L.

At the end of the work-shift, 30mL urine sample of each subject was collected into a 50 mL metal-free polypropylene centrifuge tube (Falcon, BD Biosciences) and stored at -80°C until used

The tubes used above had been detected their background value before research to ensure less elements and heavy metals contamination.

#### ***Determination of urinary 8-OHdG***

According to the manufacturer's instructions, urine samples were firstly centrifuged at 1500 rpm for 7 min, secondly the supernatant was chosen to determine the content of urinary 8-OHdG using ELISA kit (USA Cayman chem, USA Cayman chem, 8-OHdG EIA kit) by Multiskan MK3 (Thermo, USA). The concentration of Cre in urine was determinate by alkaline picric acid assay with a commercial kit (Ausbio Laboratories Co., Ltd. China) using a Hitachi 7170A automatic analyzer (Hitachi Corp, Japan). The results of 8-OHdG were regulated by Cre to avoid the potential interference of different urine density among the subjects.

#### ***CBMN test***

1  
2  
3  
4  
5  
6  
7  
8  
9  
10  
11  
12  
13  
14  
15  
16  
17  
18  
19  
20  
Peripheral venous blood which was designed in heparin tubes was taken to measure the MN frequency. The indexes (MNCC, MNC, NPB and NBUD) were counted in 1000 binuclear lymphocytes of each individual according to Fenech's protocol<sup>25</sup>. All scoring was carried out by two independent researchers through double-blind method. If the scoring difference from these two researchers was less than 20 percents, the average was calculated as the final result. If the scoring difference from these two researchers was more than 20 percents, another researcher should be asked to verify the scores, then the average were used after removing the most different value.

### 21 ***Statistical analysis***

22  
23  
24  
25  
26  
27  
Epidata 3.0 software was used to entry the questionnaire and experimental data into computer. The whole process was utilized double-entry and logistical error check to ensure the accuracy.

28  
29  
30  
31  
32  
33  
34  
35  
36  
37  
38  
39  
40  
41  
42  
43  
44  
45  
46  
47  
48  
49  
50  
51  
52  
53  
54  
55  
56  
57  
58  
59  
60  
All analysis was performed with SPSS16.0. Normality was assessed by Kolmogorov-Smirnov (*K-S*) test, the variables including 8-OHdG, MNCC and MNC did not meet the normality, so Log or Ln transformation was made for normality approximation. Continuous and categorical parameters between chromate exposed group and control group were tested using the two sample *t* test (or Mann-Whitney U nonparametric test) and  $\chi^2$  test. Curving correlation and linear regression were performed. Statistical significance was for two-sided. The *P* values were defined as  $\alpha < 0.05$ .

## Results

### General information analysis

A total of 114 subjects including 84 chromate exposed workers (mainly in form of  $K_2Cr_2O_7$ ) and 30 controls were recruited in this study. The working age of chromate exposed group was ( $7.82 \pm 5.51$ ) years. Furthermore, the personal protection (gloves and masks) of workers was above 90%. The demographic characteristics of all subjects in this research were presented in Table 1, which showed that there were no significant differences in the distribution of gender, age, smoking and alcohol consumption between these two groups.

**Table 1 General information of chromate exposed group and control group**

| Indexes              | Group           | Exposed group<br>(n=84) | Control group<br>(n=30) | T     | $\chi^2$ | P      |
|----------------------|-----------------|-------------------------|-------------------------|-------|----------|--------|
| Age                  | $\bar{X} \pm S$ | $35.73 \pm 7.85$        | $34.83 \pm 8.83$        | 0.432 |          | 0.666  |
| ≤35                  | n (%)           | 40 (47.62)              | 17 (56.67)              |       | 0.187    | 0.493  |
| >35                  |                 | 44 (52.38)              | 13 (43.33)              |       |          |        |
| Gender               | n (%)           |                         |                         |       |          |        |
| Male                 |                 | 62 (73.81)              | 19 (63.33)              |       | 0.869    | 0.351  |
| Female               |                 | 22 (26.19)              | 11 (36.67)              |       |          |        |
| Smoke                | n (%)           |                         |                         |       |          |        |
| Yes                  |                 | 30 (35.71)              | 8 (26.67)               |       | 0.610    | 0.435  |
| No                   |                 | 54 (64.29)              | 22 (73.33)              |       |          |        |
| Alcohol              | n (%)           |                         |                         |       |          |        |
| Yes                  |                 | 29 (34.52)              | 16 (53.33)              |       | 2.530    | 0.092  |
| No                   |                 | 55 (65.48)              | 9 (46.67)               |       |          |        |
| CrA                  | $\bar{X} \pm S$ | $15.45 \pm 19.00$       | $0.23 \pm 0.38$         | 6.963 |          | <0.001 |
| CrB                  | $\bar{X} \pm S$ | $9.45 \pm 9.47$         | $4.05 \pm 1.87$         | 3.215 |          | 0.018  |
| 8-OHdG<br>(ug/g Cre) | $\bar{X} \pm S$ | $43.76 \pm 34.89$       | $27.21 \pm 13.76$       | 3.354 |          | <0.001 |
| MNCC (‰)             | M(Q)            | 6.00 (4.00)             | 3.20 (2.10)             | 2.420 |          | 0.004  |
| MNC (‰)              | M(Q)            | 7.40 (4.47)             | 3.74 (2.94)             | 3.401 |          | 0.001  |
| NBUD (‰)             | M(Q)            | 1.11 (1.20)             | 1.16 (1.17)             | 0.163 |          | 0.871  |
| NPB (‰)              | M(Q)            | 1.28 (1.15)             | 1.42 (1.34)             | 0.476 |          | 0.635  |

Note: Smoking referred to suck at least one cigar per day and last one year or more, smoking quit but less than one year was also included. Alcohol was definitive by weekly drinking no less than three times

### **Concentration of CrA and CrB**

As was shown in Table 1, the concentration of CrA in chromate exposed group [(15.45 ± 19.00) µg/m<sup>3</sup>] was much higher than that in control group [(0.23 ± 0.38) µg/m<sup>3</sup>](*P*<0.001), but still under the exposure limitation of chromate [(50µg/m<sup>3</sup>)(2012, ACGIH)]. The levels of CrB in chromate exposed group [(9.45 ± 9.47) µg/L] were also significantly higher than that in control group [(4.05 ± 1.87) µg/L].

### **Levels of urinary 8-OHdG, and serum CBMN indexes**

The data distribution of indexes such as 8-OHdG, MNCC, MNC, NBUD and NPB was shown in Table 1, the levels of 8-OHdG, MNCC and MNC were all significantly higher in chromate exposed group than that in control group (*P*<0.05), which showed that 8-OHdG, MNCC and MNC could be used as the genetic damage biomarkers caused by chromate exposure.

### **Correlation**

As two biomarkers for genetic damage, there was a positive correlation between log (urinary 8-OHdG) and LnMNCC or LnMNC (*r*=0.377 and *r*=0.362 respectively) *P*<0.05)(Figure 1).

Correlation was also analyzed between the concentration of urinary 8-OHdG and CrB. As was recorded in Figure 2 and 3, there was no linear correlation but a curve fitting between CrB and Log (8-OHdG), the value of 8-OHdG was decreased when the concentration of CrB was more than 10.50µg/L. Based on the results above, the concentration of CrB was stratified into two groups: the high exposed group (CrB ≥10.50µg/L) and the low exposed group (CrB <10.50µg/L). A positive correlation was shown between CrB and log (8-OHdG) when the CrB Level was lower than 10.50µg/L (*r*=0.355, *P*<0.05), while there was a negative correlation between CrB and log (8-OHdG) when the CrB Level was higher than 10.50µg/L.

The relationship between the concentration of MNCC or MNC and CrB was also analyzed in this research (Figure 4 and 5). There were no linear correlation but a

1  
2  
3 curve fitting between CrB and LnMNCC or LnMNC. The value of MNCC or MNC  
4 was decreased when the concentration of CrB was more than 9.10µg/L. Based on the  
5 results above, the concentration of CrB was stratified into two groups: the high  
6 exposed group (CrB ≥9.10µg/L) and the low exposed group (CrB <9.10µg/L). A  
7 positive correlation was shown between CrB and LnMNCC or LnMNC in higher  
8 chromate exposed group ( $r=0.365$  and  $r=0.269$  respectively,  $P<0.05$ ), while a  
9 significantly negative relationship was found between CrB and LnMNCC or LnMNC  
10 in the lower chromate exposed group. ( $r=-0.279$  and  $r=-0.261$  respectively,  $P<0.05$ ).  
11  
12  
13  
14  
15  
16  
17  
18  
19  
20  
21  
22

### 23 **Discussion**

24 Long-term and low level chromate exposure can not only increase the body's  
25 internal load but also cause a variety of harmful effects on workers' health even  
26 increasing the incidence of human cancer<sup>26, 27</sup>. In occupational activity, chromate  
27 could enter into workers' body mainly by respiratory system, then be metabolism and  
28 excreted by urine, so our previous researches have proved the concentration of  
29 chromate in whole blood and urine can be used as the indicators to assess chromate  
30 biological exposure<sup>6, 28</sup>. In this study, it was found that the concentrations of CrA and  
31 CrB in exposed group were all significantly higher than that in control group  
32 ( $P<0.05$ ), while the CrB level in chromate exposed group was nine times more than  
33 that in the general population of our country (1.19 µg/L)<sup>29</sup>, which showed that the  
34 conclusion was credible by contrasting the genetic damage indexes between chromate  
35 exposed group and control group.  
36  
37  
38  
39  
40  
41  
42  
43  
44  
45  
46

47 As we all known when Cr-VI enters human blood, it will be converted into other  
48 valence chromate compounds such as Cr-III, which could not only produce a large  
49 amount of ROS that can cause the redox system imbalance, but also directly or  
50 indirectly coordinate with DNA or protein. The transformation above can affect  
51 genetic stability including oxidative DNA lesion, DNA cross-links, single and double  
52 strand breaks and so on<sup>30, 31, 32</sup>. Besides, long-term chromate exposure can also cause  
53  
54  
55  
56  
57  
58  
59  
60

1  
2  
3 cyto-toxicity to lead cells apoptosis<sup>33</sup>.  
4

5 Urinary 8-OHdG has been demonstrated as a biomarker for oxidative DNA damage  
6 in chromate exposure not only by animal experiment but also by many  
7 epidemiological researches<sup>34,35</sup>, because it is the site that ROS often attacks, but the  
8 dose-response relationship with occupational exposure indicators was not depicted  
9 clearly. Overall, in this research, the relationship between urinary 8-OHdG and CrB  
10 was two-way changes. The concentration of urinary 8-OHdG was not significantly  
11 increasing when the level of CrB was more than 10.50µg/L, which showed that the  
12 concentration of urinary 8-OHdG would fail to predict the degree of DNA damage  
13 when the CrB was higher than some degree. There are some reasons for this result,  
14 firstly Sumner E.R has proved that oxidative DNA damage by chromate exposure  
15 mainly targets on specifically certain glycol tic enzymes on 8-OHdG<sup>36</sup>, which means  
16 once higher burden of CrB was produced, it could oxidize and change the structure of  
17 glycolytic enzymes to reduce the production of free 8-OHdG. secondly, some  
18 researchers have proved that 8-OHdG was not the final product of redox reaction, so  
19 when the level of CrB was higher, 8-OHdG could be converted to these further  
20 oxidation products such as Spiroiminodihydantoin (Sp)<sup>37</sup>, so the concentration of free  
21 8-OHdG was reduced. Thirdly, as we all know, the kidney can be damaged by chronic  
22 chromate exposure. As the level of CrB increased, the kidney was at greater health  
23 risk, which ultimately affect the exertion of 8-OHdG in urine<sup>38</sup>.  
24  
25  
26  
27  
28  
29  
30  
31  
32  
33  
34  
35  
36  
37  
38  
39  
40

41 Micronuclei is another biomarker which commonly used as the genetic damage of  
42 chromate exposure<sup>39,40</sup>. Many researches showed that chromate exposure could cause  
43 the increasing of MN frequency in cell research, animals experiment, and human  
44 being<sup>41,42</sup>. In this research, the similar conclusion was proved that the MN frequency  
45 was significantly higher in chromate exposed group than that in control group and  
46 the general population<sup>43, 44</sup>( $P<0.05$ ). The frequencies of MNCC and MNC (as the  
47 sensitive indexes of MN) have statistical differences between these two groups.  
48 However, the dose-response relationship with CrB still need many further  
49 investigations, so this research was meaningful to discuss the suitable condition of  
50 MN as genetic damage. In this study, no linear correlation was shown between CrB  
51  
52  
53  
54  
55  
56  
57  
58  
59  
60



1  
2  
3 and LnMNCC or LnMNC, the MN frequency did not increase as the CrB elevated.  
4  
5 When all subjects were divided into two subgroups by the concentration of CrB, a  
6  
7 positive correlation was shown between CrB and LnMNCC and LnMNC in high CrB  
8  
9 group( $\text{CrB} \geq 9.10 \mu\text{g/L}$ ) ( $r=0.365$  and  $r=0.269$  respectively), while a significantly  
10  
11 inverse relationship was found between CrB with LnMNCC and LnMNC in low CrB  
12  
13 group( $\text{CrB} < 9.10 \mu\text{g/L}$ ) ( $r=-0.279$  and  $r=-0.261$  respectively). The reason for these  
14  
15 results may be that the occupational chromate exposure can increase the frequency of  
16  
17 the MN in some range. As the increasing of CrB, the cytotoxic effect might play an  
18  
19 important role and the cells with serious genetic damage may turn into apoptosis or  
20  
21 MN<sup>45,46</sup>.

22 Both MN and urinary 8-OHdG can be used to predict different types of DNA  
23  
24 damage in some range. A positive correlation between urinary 8-OHdG and MN was  
25  
26 found, which suggested that these two indicators as genetic damage biomarker can be  
27  
28 verified each other.

29  
30 There was still some limitation in this study: the sample size of this study was  
31  
32 not very large, especially the control group, so we chose some references<sup>38,43,44</sup> to give  
33  
34 the value of 8-OHdG and MN in normal population to reduce the generation of bias.  
35  
36 And it is necessary that more sample size epidemiological surveys in different  
37  
38 chromate producing factories should be chosen to verify our conclusion.

### 39 40 **Conclusions**

41  
42 All these above had provided new insights that both MN and urinary 8-OHdG can  
43  
44 be used as the genetic damage biomarkers caused by occupational chromate exposure  
45  
46 at some levels. The combination of these indicators can improve the credibility of the  
47  
48 results. It is not the simple linear relationship between their concentration and the  
49  
50 level of chromate exposure. Only when the level of CrB is below  $9.10 \mu\text{g/L}$  and  
51  
52  $10.50 \mu\text{g/L}$ , the MN frequency and urinary 8-OHdG can respectively show the degree  
53  
54 of genetic damage quantitatively.  
55  
56  
57  
58  
59  
60

**FOOTNOTES:*****Contributor ship statement***

All the authors included in the paper granted the criteria of the authorship. PL together with YG conceived and executed this investigation, analyzed of the data and described this manuscript. YL and JLY supported this investigation from the epidemiological aspect. GJ is responsible for the whole conduct of this study and all content of this. SFY contribute to the organization and arrangement for the scene investigation. All authors commented critically on the manuscript and agreed with this submitting.

***Competing interests***

There are none competing interests.

***Funding***

This work was supported by the project of National Natural Science Foundation of china [81073043 and 81072281] and the Doctor Fund of Ministry of Education of china (20120001110103).

***Data sharing***

No additional data available

**FIGURE LEGENDS**

Figure 1 Correlation between LnMNCC or LnMNC with Lg (concentration of 8-OHdG in urine) in chromate exposed group

Figure 2 Correlation between urinary 8-OHdG and CrB in chromate exposed group

Figure 3 a showed the correlation between urinary 8-OHdG and CrB in higher chromate exposed group ( $CrB \geq 10.50$ ). b showed the the linear relationship between urinary 8-OHdG and CrB in lower chromate exposed group ( $CrB < 10.50$ ),

Figure 4 Correlation between LnMNC or LnMNCC and CrB in chromate exposed group

Figure 5 a showed the correlation between LnMNC or LnMNCC and CrB in higher chromate exposed group ( $CrB \geq 10.50$ ). b showed the the linear relationship between LnMNC or LnMNCC and CrB in lower chromate exposed group ( $CrB < 10.50$ )

## Reference

1. Monika G, Joachim E, Peter B, et al. Biological effect markers in exhaled breath condensate and biomonitoring in welders: impact of smoking and protection equipment [J]. *Int Arch Occup Environ Health*, 2010, 83 (7): 803 – 811.
2. Andrea C, Matteo G, Olga A, et al. The effect of inhaled chromium on different exhaled breath condensate biomarkers among chrome-plating workers [J]. *Environmental Health Perspectives*, 2006, 114 (4): 542-546.
3. Shrivastava R, Upreti RK, Seth PK, et al. Effects of chromium on the immune system [J]. *Immunology and Medical Microbiology*, 2002, 34 (4): 1-7.
4. Shashwat K, Awasthi SK, Srivastava JK. Effect of chromium on the level of IL-12 and IFN- $\gamma$  in occupationally exposed workers [J]. *Science of the total environment*, 2009, 407 (6): 1868-1874.
5. Mohammad BH, Marie V, Gabriela C, et al. Low level environmental cadmium exposure is associated with DNA hypomethylation in argentinean women [J]. *Environmental Health Perspectives*, 2012, 120 (6): 879 – 884.
6. Xiaohua L, Yanshuang S, Li W, et al. Evaluation of the correction between genetic damage and occupational chromate exposure through BMMN frequenciess[J]. *J Occup Environ Med*, 2012, 54(2):166-170.
7. De Flora S, Bagnasco M, Serra D, et al. Genotoxicity of chromium compounds: A review[J]. *Mutation Research/Reviews in Genetic Toxicology*, 1990, 238 (5): 99-172.
8. Wu LL, Chiou CC, Chang PY, et al. Urinary 8-OHdG: a marker of oxidative stress to DNA and a risk factor for cancer, atherosclerosis and diabetics[J]. *Clinica Chimica Acta*, 2004, 339 (1-2 ): 1-9.
9. Ren C, Fang S, Wright RO, et al. Urinary 8-hydroxy-2-deoxyguanosine as a biomarker of oxidative DNA damage induced by ambient pollution in the Normative Aging Study[J]. *Occupational and environmental medicine*, 2011, 68 (2): 562-569.
10. Lin CY, Lee HL, Chen YC, et al. Positive association between urinary levels of 8-hydroxydeoxyguanosine and the acrylamide metabolite N-acetyl-S-(propionamide)-cysteine in adolescents and young adults[J]. *J Hazard Mater*, 2013, 261: 372-377.
11. Kim JY, Mukherjee S, Ngo LC, et al. Urinary 8-hydroxy-2'-deoxyguanosine as a biomarker of oxidative DNA damage in workers exposed to fine particulates[J]. *Environmental health perspectives*, 2004, 112 (6): 666-671.
12. Valavanidis A, Loridas S, Vlahogianni T, et al. Influence of ozone on traffic-related particulate matter on the generation of hydroxyl radicals through a heterogeneous synergistic effect[J]. *J Hazard Mater*. 2009, 162 (2-3): 886-892.
13. Valavanidis A, Vlachogianni T, Fiotakis C. 8-hydroxy-2-deoxyguanosine (8-OHdG): a critical biomarker of oxidative stress and carcinogenesis[J]. *Journal of environmental science and health Part C*, 2009, 27 (2): 120-139.
14. Fenech M, Kirsch-Volders M, Natarajan AT, et al. Molecular mechanisms of micronucleus, nucleoplasmic bridge and nuclear bud formation in mammalian and human cells. *Mutagenesis*, 2011, 26: 125 – 132.
15. Sobol Z, Schiestl RH. Intracellular and extracellular factors influencing Cr (VI) and Cr (III) genotoxicity[J]. *Environmental and Molecular Mutagenesis*, 2012, 53 (2): 94-100.
16. Kuo H, Chang S, Wu K, et al. Chromium (VI) induced oxidative damage to DNA: increase of urinary 8-hydroxydeoxyguanosine concentrations (8-OHdG) among electroplating workers[J]. *Occupational and environmental medicine*, 2003, 60 (8): 590-594.
17. Kim H, Cho S-H, Chung M-H. Exposure to hexavalent chromium does not increase 8-hydroxydeoxyguanosine levels in Korean chromate pigment workers[J]. *Industrial health*, 1999, 37 (3): 335-341.
18. Gao M, Levy LS, Faux SP, et al. Use of molecular epidemiological techniques in a pilot study

- 1  
2  
3 on workers exposed to chromium[J]. Occupational and environmental medicine, 1994, 51  
4 (10): 663-668.
- 5 19. Zhang XH, Zhang X, Wang XC, et al. Chronic occupational exposure to hexavalent  
6 chromium causes DNA damage in electroplating workers.[J] BMC Public Health, 2011, 11  
7 (3): 224.
- 8 20. Xiaohua L, Yanshuang S, Li W, et al. Evaluation of the correction between genetic damage  
9 and occupational chromate exposure through BMMN frequencies. J Occup Environ Med  
10 2012, 54 (2): 166-170.
- 11 21. Danadevi K, Rozati R, Banu BS, et al. Genotoxic evaluation of welders occupationally  
12 exposed to chromium and nickel using the Comet and micronucleus assays[J]. Mutagenesis,  
13 2004, 19 (1): 35-41.
- 14 22. Thompson CM, Fedorov Y, Brown DD, et al. Assessment of Cr (VI)-induced cytotoxicity and  
15 genotoxicity using high content analysis[J]. PloS one, 2012, 7 (8): 742-720.
- 16 23. GBZ 159-2004. Specifications of air sampling for hazardous substances monitoring in the  
17 workplace. China.
- 18 24. Yanshuang Song, Ji Zhang, Shanfa Yu, et al. Effects of chronic chromium (VI) exposure on  
19 blood element homeostasis: An epidemiological study. Metallomics, 2012, 4: 463-472
- 20 25. Fenech M. Cytokinesis-block micronucleus cyto assay[J]. Nature protocols, 2007, 2 (1):  
21 1084-1104.
- 22 26. Clancy HA, Sun H, Passantino L, et al. Gene expression changes in human lung cells exposed  
23 to arsenic, chromium, nickel or vanadium indicate the first steps in cancer[J].  
24 Metallomics. 2012, 4(8):784-793.
- 25 27. Chhabra D, Oda K, Jagannath P, et al. Chronic heavy metal exposure and gbladder cancer risk  
26 in India, a comparative study with Japan[J]. Asian Pacific Journal of Cancer Prevention. 2012,  
27 13(1): 187-190.
- 28 28. Yan L, Jia G, Zhang J, et al. The correlation between personal occupational exposure to soluble  
29 chromate and urinary chromium content. Zhonghua yu Fang yi xue za zhi (Chinese Journal of  
30 Preventive Medicine) 2006, 40(6): 386-389 (Article in Chinese).
- 31 29. Ding CG, Pan Yj, Zhang AH, et al. Distribution of chromium in whole blood and urine among  
32 general population in China between year 2009 and 2010. Zhonghua yu Fang yi xue za zhi  
33 (Chinese Journal of Preventive Medicine) 2012, 46(8): 679-682. ( Article in Chinese).
- 34 30. Zhitkovich, A. Importance of chromium-DNA adducts in mutagenicity and toxicity of  
35 chromium(VI)[J]. Chem. Res. Toxicol., 2005, 18 (1): 3-11.
- 36 31. Wang TC, Song YS, Wang H, et al. Oxidative DNA damage and global DNA hypomethylation  
37 are related to folate deficiency in chromate manufacturing workers[J]. Journal of Hazardous  
38 Materials, 2012, 213.214:440-446.
- 39 32. Brien, T.J.; Ceryak, S.; Patierno, S.R. Complexities of chromium carcinogenesis: role of  
40 cellular response, repair and recovery mechanisms[J]. Mutat. Res. Fundam. Mol. Mech.  
41 Mutagen., 2003, 533 (14): 3-36.
- 42 33. Martini CN, Brandani JN, Gabrielli M, et al. Effect of hexavalent chromium on  
43 proliferation and differentiation to adipocytes of 3T3-L1 fibroblasts[J]. Toxicol In Vitro, 2014  
44 28(4):700-706.
- 45 34. Goulart M, Batoreu M, Rodrigues A, et al. Lipoperoxidation products and thiol antioxidants in  
46 chromium exposed workers[J]. Mutagenesis, 2005, 20 (5): 311-315.
- 47 35. Khan FH, Ambreen K, Fatima G, et al. Assessment of health risks with reference to oxidative  
48 stress and DNA damage in chromium exposed population[J]. Science of the Total Environment,  
49 2012, 430 (2): 68-74.
- 50 36. Sumner ER, Shanmuganathan A, Sideri TC, et al. Oxidative protein damage causes chromium  
51 toxicity in yeast[J]. Microbiology, 2005, 151: 1939-1948.
- 52 37. Steenken S, Jovanovic SV, Bietti M, et al. The trap depth (in DNA) of 8-oxo-7, 8-dihydro-2'  
53 deoxyguanosine as derived from electron-transfer equilibria in aqueous solution[J]. Journal of  
54 the American Chemical Society, 2000, 122 (10): 2373-2374.
- 55 38. Wang T, Jia G, Zhang J, et al. Renal Impairment Caused by Chronic Occupational Chromate  
56 Exposure[J]. Int Arch Occ Env Hea, 2011, 84 (4):393 - 401.
- 57 39. Urbano AM, Ferreira LM, Alpoim MC. Molecular and cellular mechanisms of hexavalent  
58 chromium-induced lung cancer: an updated perspective[J]. Curr Drug Metab, 2012, 13 (3):  
59 284-305.
- 60

- 1  
2  
3  
4  
5  
6  
7  
8  
9  
10  
11  
12  
13  
14  
15  
16  
17  
18  
19  
20  
21  
22  
23  
24  
25  
26  
27  
28  
29  
30  
31  
32  
33  
34  
35  
36  
37  
38  
39  
40  
41  
42  
43  
44  
45  
46  
47  
48  
49  
50  
51  
52  
53  
54  
55  
56  
57  
58  
59  
60
40. de Lemos CT, Rödel PM, Terra NR, et al. Evaluation of basal micronucleus frequency and hexavalent chromium effects in fish erythrocytes[J]. *Environmental toxicology and chemistry*, 2001, 20 (6): 1320-1324.
  41. Reynolds M, Armknecht S, Johnston T, et al. Undetectable role of oxidative DNA damage in cell cycle, cytotoxic and clastogenic effects of Cr(VI) in human lung cells with restored ascorbate levels[J]. *Mutagenesis*, 2012, 27 (4): 437-443.
  42. Bagchi D, Stohs SJ, Downs BW, et al. Cytotoxicity and oxidative mechanisms of different forms of chromium[J]. *Toxicology*, 2002, 180 (1): 5-22.
  43. The HUMN and HUMNxL international collaboration projects on human micronucleus assays in lymphocytes and buccal cells—past, present and future. *Mutagenesis*, 2011, 10 (1): 239–245.
  44. Bonassi S, Fenech M, Lando C, et al. Human MicroNucleus Project: International database Comparison for results with the cytokinesis-block micronucleus assay in human lymphocytes: effect of laboratory protocol, scoring criteria, and host factors on the frequency of micronuclei. *Environ Mol Mutagen*.2001;37:31–45
  45. Vasylykiv OY, Kubrak OI, Storey KB, et al. Cytotoxicity of chromium ions may be connected with induction of oxidative stress[J]. *Chemosphere*, 2010, 80 (9): 1044-1049.
  46. Arakawa H, Tang MS. Recognition and incision of Cr(III) ligand-conjugated DNA adducts by the nucleotide excision repair proteins UvrABC: importance of the Cr(III)-purine moiety in the enzymatic reaction[J]. *Chem Res Toxicol*, 2008, 21 (6): 1284-1289.

1  
2  
3  
4  
5  
6  
7  
8  
9 **~~A cross-sectional study: The suitable condition of 8-OHdG and~~**  
10  
11 **~~micronucleus as genotoxic~~**  
12  
13 **~~—damage biomarkers in occupational chromate exposed workers~~**  
14  
15  
16  
17  
18

Formatted: Font color: Red

19 Ping Li<sup>1</sup>, Yongen Gu<sup>\*1</sup>, Shanfa Yu<sup>2</sup>, Yang Li<sup>1</sup>, Jinglin Yang<sup>1</sup>, Guang Jia<sup>1</sup>

20  
21 \* co-author: equally with the first author  
22  
23  
24  
25  
26  
27  
28

29 1. Department of Occupational and Environmental Health Science, School of Public  
30 Health, Peking University, Beijing 100191, P. R. China  
31  
32

33  
34 2. Department of Occupational Health Science, Institute of Occupational Medicine,  
35 Zhengzhou City, Henan Province 450052, P. R. China  
36  
37  
38  
39  
40  
41  
42  
43

44 Address correspondence to:

45  
46 Department of Occupational and Environmental Health Science, School of Public  
47 Health, Peking University, Beijing 100191, P. R. China

48  
49 Tel: +86-010-8280-2333, Fax: +86-010-8280-2333

50  
51 E-mail: [jiaguangjia@bjmu.edu.cn](mailto:jiaguangjia@bjmu.edu.cn)  
52  
53  
54  
55  
56  
57  
58  
59  
60

## Abstract

**Objectives:** We aimed to investigate the suitable condition of 8-hydroxy-2'-deoxyguanosine (8-OHdG) and micronucleus (MN) as genotoxic biomarkers at different levels of occupational chromate exposure.

**Design:** A cross-sectional study was used.

**Participants:** 84 workers who exposed chromate ~~exposing chromate~~ at least one year were chosen as exposed group, while 30 non-exposed individuals were used as controls.

**Main outcome measures:** Environmental and biological exposure of chromate was assessed respectively by measuring the concentration of chromate in the air (CrA) and blood (CrB) by ICP-MS in all participants ~~subjects~~. CBMN ~~was conducted, in which many indexes~~ including MNCC, MNC, NPB and NBUD were calculated, while the urinary 8-OHdG was measured by ELISA method and normalized by the concentration of Cre.

**Results:** Compared with the control group, the levels of CrA, CrB, MNCC, MNC and 8-OHdG in chromate exposed group were all significantly higher ( $P < 0.05$ ). There was a positive correlation between log(8-OHdG) and LnMNCC or LnMNC ( $r = 0.377$  and  $r = 0.362$ ). The levels of LnMNCC, LnMNC and Log (8-OHdG) all did not have the parabola correlation ~~simple linear relationship~~ with the concentration of CrB. But ~~There there~~ was a significantly positive correlation between Log (8-OHdG) and CrB when CrB level was below 10.50 ug/L ( $r = 0.355$ ). ~~W~~ while a positive correlation was also found between LnMNCC or LnMNC with CrB when CrB level was lower than 9.10 ug/L ( $r = 0.365$  and  $r = 0.269$  respectively).

**Conclusions:** The MN and 8-OHdG can be used as the genotoxic ~~biomarkers for the genetic damage~~ in chromate exposed group, but only when CrB levels were lower

Formatted: Line spacing: 1.5 lines

Formatted: Font: Bold



than 9.10ug/L and 10.50ug/L respectively, they can accurately reflect the degree of genetic damage.

**Key terms:** ~~chromate~~**Chromate**; ~~Genotoxicetic~~ **damage**; ~~8-hydroxy-2'-deoxyguanosine~~**8-OHdG**; Micronucleus, Concentration of chromate in the blood

Formatted: Font: Bold

Formatted: Font: Bold

### Abbreviation:

Cytokinesis-block micronucleus test-----CBMN

Micronuclei cell count -----MNCC

Micronucleus count -----MNC

Nuclear bridge-----NPB

Nuclear bud -----NBUD

Creatinine-----Cre

### *Strengths and limitations of this study(Article summary)*

Strengths: All our results had provided new insights that only when the concentration of CrB was lower than 9.10ug/L and 10.45ug/L respectively, the MN and 8-OHdG can be used as the effective biomarkers to show the degree of genetic damage ~~for the in~~ chromate ~~occupational exposed group~~ ~~are~~. Otherwise, ~~when the concentration of CrB was~~ above these levels, the cytotoxic effects might play an important role and the ~~fate of~~ cells with serious genetic damages may turn into apoptosis or necrosis, consequently which could lead to the false appearance of lower degree of MN and 8-OHdG ~~at higher chromate exposed level~~.

Formatted: Font: Bold

Formatted: Font: Bold

Limitations: the ~~sample~~ size of this study ~~population~~ was not very large, especially the ~~group of~~ control ~~individuals~~ ~~group~~, so we chose some references to give the ~~normal~~ value of MN and 8-OHdG ~~in normal population in other controls~~ to reduce the ~~mitigation~~ ~~generation~~ of bias. ~~In this research, we got the recommended condition of 8-OHdG and MN as genetic damage biomarker in~~

Formatted: Font: Bold

~~chromate exposed group. And It it~~ is necessary that more ~~sample sizeoccupational~~ epidemiological surveys in different chromate producing factories should be chosen to verify ~~this our~~ conclusion.

Formatted: Font: Bold

Formatted: Font: Bold

## Introduction

Chromate is a widely used chemical in industrial and agricultural production in china, which could generate many pollutants including the waste water, ~~waste~~ gas and ~~waste~~ residue in ~~ehromate its~~ production, usage, transportation and storage. Previous studies had proved that Longlong-term chromate exposure in occupational workplace ~~can-could~~ affect the health status of workers even cancer, so it has been declared as a well-known environmental and occupational hazards<sup>1</sup>.

Formatted: Superscript

There are many different valences of chromate, in which the hexavalent chromate (Cr-VI) is the most harmful one. Cr-VI can enter human body mainly by inhalation during occupational activities. When entering into respiratory system (nose, bronchial and lung), some Cr-VI could accumulate in bronco-alveolar lining fluid, mucosa and pulmonary tissues<sup>1,2</sup> and then cross the cell membrane through non-specific phosphate/ sulfate anionic transporters to the blood. ~~be converted to Cr-V, Cr-IV and Cr-III, and accumulated in bronco alveolar lining fluid, mucosa and pulmonary tissues<sup>1,2</sup>.~~ This transformation also can consequently form many reactive intermediates (Cr-V, Cr-IV and Cr-III) and reactive oxygen species (ROS) with oxidative stress<sup>3,4</sup>. Both Cr-III and ROS could contribute to interact with various biological macromolecule such as Cr-DNA adducts, Cr-protein adducts, and

Formatted: Not Superscript/ Subscript

Formatted: Not Superscript/ Subscript

1  
2  
3  
4  
5  
6 protein-Cr-DNA adducts proteins, DNA. This can and other biological macromolecule  
7 to cause damage on DNA and chromosome, including base modification,  
8 single-strand breaks and double-strand breaks. These damages can result in genetic  
9 damage and ultimate carcinogenesis which can initiate carcinogenesis if accumulated  
10 to some degree<sup>5, 6, 7</sup>.

11  
12  
13  
14  
15 Based on the evidence above, many studies have proved that 8-OHdG can be  
16 asused as a product biomarker of oxidative DNA damage, can be used to assess the  
17 oxidative damage and DNA mutations that are induced by the ROS in clinical<sup>8</sup>,  
18 environmental<sup>9,10</sup> and occupational setting in vitro<sup>11,12</sup> or in cell cultures<sup>13</sup>. MN in  
19 peripheral blood was another biomarker to show the genetic damage. in peripheral  
20 blood It originates from chromosome fragments that are attacked by certain physical  
21 and chemical factors such as chromium chromate or whole chromosomes that lag  
22 behind at anaphase during nuclear division. When the excision-repairable DNA  
23 lesions induced in G0/G1 phase, they can be converted to MN by using inhibitors of  
24 the gap filling step of excision repairmen, so that unfilled gaps are converted to  
25 double strand breaks after S phase<sup>14</sup>, so the frequency of MN can be used to reflect  
26 the genetic damage<sup>15</sup>. The CBMN test is a common method to detect the MN  
27 frequencies including many indexes such as MNCC, MNC, NPB and NBUD. In these  
28 indexes, MNCC and MNC were commonly used to detect the DNA damage<sup>14</sup>.

29  
30  
31  
32  
33  
34  
35  
36  
37  
38 Previous studies have elose discussed the relationship between CrB and urinary  
39 8-OHdG or MN in to discuss the feasibility of 8-OHdG and MN as the biomarker for  
40 chromium chromate exposureexposed group to investigate the feasibility of 8-OHdG  
41 and MN as genetic damage biomarkers. howeverHowever, the conclusion about this  
42 connection have yielded conflicting results: Kuo found the linear correlation between  
43 urinary 8-OHdG and CrB<sup>16</sup>, but Gao, Kim and Zhang all didn't confirm it  
44 subsequently<sup>17,18,19</sup>, many some research studies had been identified there was some  
45 association between CrB and MN frequencies<sup>20,21,22</sup>, but the suitable conditions and  
46 limitations for of 8-OHdG and MN as genotoxic biomarkers for occupational  
47 chromate exposure have still been unclear. So our researches aimed to observe the  
48 effect of chromate exposure on genetic damage in occupational workers, especially  
49  
50  
51  
52  
53  
54  
55  
56  
57  
58  
59  
60

Formatted: Indent: First line: 0 ch, Adjust space between Latin and Asian text, Adjust space between Asian text and numbers

1  
2  
3  
4  
5  
6 urinary 8-OHdG for the oxidative DNA damage and MN for chromosome damage.

7  
8 Then ~~it was we~~ discussed whether MN frequency and 8-OHdG can be used as the  
9  
10 effective genotoxic biomarkers at different levels of chromate exposure.  
11  
12  
13  
14  
15  
16  
17  
18  
19  
20  
21  
22  
23  
24  
25  
26  
27  
28  
29  
30  
31

## 32 *Materials and methods*

### 33 *Study design and population*

34  
35 A cross-sectional survey was designed for this research. The factory was chosen  
36  
37 as the work place in Henan province in china because (1) the product--potassium  
38  
39 dichromate was relatively simple, most of which was water-soluble hexavalent  
40  
41 chromate. (2) Annual health check-ups were offered in this factory for workers, which  
42  
43 allowed us to easily collect specimens ~~from workers~~ to minimize the interference with  
44  
45 normal work schedules.

46  
47 In this research, 84 workers exposed to chromate in the factory were chosen as  
48  
49 exposed group, while 30 non-exposed individuals working in the administration office  
50  
51 were as control group. The criteria of subjects included: (1) workers in exposed group  
52  
53 were at least one year employment and 3 months working in the same work position.  
54  
55 (2) aged between 25-50. (3) no medical history of allergy, asthma or allergic rhinitis,  
56  
57 (4) all subjects with skin infections, fever or other clinical diseases should be  
58  
59  
60

1  
2  
3  
4  
5  
6  
7 excluded during the sampling period. (5) Pregnant and nursing women were not  
8 enrolled.

9  
10 All subjects were in the same factory with similar education and social  
11 backgrounds. They all were requested to complete a questionnaire and had a clinical  
12 examination [before sample collection](#). The questionnaire included a lot of information  
13 ~~including such as~~ occupational history, personal medical history, medication used in 4  
14 weeks before the study, body weight and height, hair dye, house decoration, radiation  
15 exposure, individual protection, smoking status and alcohol intake.  
16  
17  
18  
19

### 20 *Ethical consideration*

21  
22 This ~~study-research~~ was approved by Medical Ethics Committee of Peking  
23 University, Health Science Center (HSC), Beijing, China. Written informed consent  
24 from each study subject was also obtained.  
25  
26

### 27 *Air and Biological exposure assessment*

28  
29 [According to the sampling criterion in monitoring of hazardous substances in the](#)  
30 [air \(GBZ 159-2004\)<sup>23</sup>](#), ~~Six-six~~ air sampling sections were respectively chosen in the  
31 workplaces of two groups, 10 sampling points were chosen in each section. The  
32 sampling process was used pumping at 1L/min for 8 hours (Sp730, TSI Corporation,  
33 USA), the membranes used in this study were MCE mixed cellulose ester filters  
34 ( $\Phi$ 37mm, pall, America). The average concentration of all sampling points on the  
35 membranes in the same group was measured by atomic absorption spectrometry<sup>24</sup> and  
36 then calculated to evaluate the CrA during the whole production process, the detection  
37 limit for the CrA was 0.001  $\mu$ g/L.  
38  
39  
40  
41  
42  
43

44 ~~2ml-4ml~~ anticoagulant (EDTA and heparin) blood in peripheral was drew from  
45 each subject after finishing the questionnaire and then assigned to [these](#) two tubes on  
46 average. They were respectively used to measure the CrB and CBMN. The  
47 concentration of CrB was measured by inductively coupled plasma mass spectrometer  
48 (ICP-MS)<sup>26,24</sup>. the detection limits was 0.0012  $\mu$ g/L.  
49  
50  
51

52 ~~The tubes used above had been detected their background value before research~~  
53 ~~to ensure less elements and heavy metals contamination.~~  
54  
55  
56  
57  
58  
59  
60

Formatted: Superscript

Formatted: Superscript

1  
2  
3  
4  
5  
6  
7  
8  
9  
10  
11  
12  
13  
14  
15  
16  
17  
18  
19  
20  
21  
22  
23  
24  
25  
26  
27  
28  
29  
30  
31  
32  
33  
34  
35  
36  
37  
38  
39  
40  
41  
42  
43  
44  
45  
46  
47  
48  
49  
50  
51  
52  
53  
54  
55  
56  
57  
58  
59  
60

At the end of the work-shift, 30mL urine sample of each subject was collected into a 50 mL metal-free polypropylene centrifuge tube (Falcon, BD Biosciences) and stored at -80°C until used ~~to measure the contents of 8-OHdG and Cre.~~

The tubes used above had been detected their background value before research to ensure less elements and heavy metals contamination.

### ***Determination of urinary 8-OHdG***

According to the manufacturer's instructions, urine samples were firstly centrifuged at 1500 rpm for 7 min, secondly the supernatant was chosen to determine the content of urinary 8-OHdG using ELISA kit (USA Cayman chem, USA Cayman chem, 8-OHdG EIA kit) by Multiskan MK3 (Thermo, USA) ~~and The concentration of Cre in urine was determinate~~ by alkaline picric acid assay with a commercial kit (Ausbio Laboratories Co., Ltd. China) using a Hitachi 7170A automatic analyzer (Hitachi Corp, Japan). The results of 8-OHdG were regulated by Cre to avoid the potential interference of different urine density among the subjects.

### ***CBMN test***

Peripheral venous blood which was designed in heparin ~~ized~~ tubes ~~with individual numbers~~ was taken to measure the MN frequency. The indexes (MNCC, MNC, NPB and NBUD) were counted in 1000 binuclear lymphocytes of each individual according to Fenech's protocol<sup>23</sup>. All scoring was carried out by two independent researchers through double - blind method. If the scoring difference from these two researchers was less than 20 percents, the average was calculated as the final result. If the scoring difference from these two researchers was more than 20 percents, another researcher should be asked to verify the scores, then the average were used after removing the most different value.  
~~If the result from these two researchers was different, another researcher should be asked to verify the scores.~~

### ***Statistical analysis***

Epidata 3.0 software was used to entry the questionnaire and experimental data into computer. The whole process was utilized double-entry and logistical error check

1  
2  
3  
4  
5  
6  
7 to ensure the accuracy.

8 All analysis was performed with SPSS16.0. Normality was assessed by  
9 Kolmogorov-Smirnov (*K-S*) test, the variables including 8-OHdG, MNCC and MNC  
10 did not meet the normality, so Log or Ln transformation was made for normality  
11 approximation. Continuous and categorical parameters between chromate exposed  
12 group and control group were tested using the two sample *t* test (or Mann-Whitney U  
13 nonparametric test) and  $\chi^2$  test. Curving correlation and linear regression were  
14 performed. Statistical significance was for two-sided. The *P* values were defined as  
15  $\alpha < 0.05$ .  
16  
17  
18  
19  
20  
21  
22  
23  
24  
25  
26  
27  
28  
29  
30  
31  
32  
33  
34  
35  
36

## 37 **Results**

### 38 **General information analysis**

39 A total of 114 subjects including 84 chromate exposed workers (mainly in form of  
40  $K_2Cr_2O_7$ ) and 30 controls were recruited in this study. The working age of chromate  
41 exposed group was  $(7.82 \pm 5.51)$  years. Furthermore, the personal protection (gloves  
42 and masks) of workers was above 90%. The demographic characteristics of all  
43 subjects in this research were presented in Table 1, which showed that there were no  
44 significant differences in the distribution of gender, age, smoking and alcohol  
45 consumption between these two groups.  
46  
47  
48  
49  
50  
51  
52  
53  
54  
55  
56  
57  
58  
59  
60

Table 1 General information of chromate exposed group and control group

| Indexes              | Group           | Exposed group<br>(n=84) | Control group<br>(n=30) | T     | $\chi^2$ | P      |
|----------------------|-----------------|-------------------------|-------------------------|-------|----------|--------|
| Age                  | $\bar{X} \pm S$ | 35.73 $\pm$ 7.85        | 34.83 $\pm$ 8.83        | 0.432 |          | 0.666  |
| $\leq 35$            | n (%)           | 40 (47.62)              | 17 (56.67)              |       | 0.187    | 0.493  |
| $> 35$               |                 | 44 (52.38)              | 13 (43.33)              |       |          |        |
| Gender               | n (%)           |                         |                         |       | 0.869    | 0.351  |
| Male                 |                 | 62 (73.81)              | 19 (63.33)              |       |          |        |
| Female               |                 | 22 (26.19)              | 11 (36.67)              |       |          |        |
| Smoke                | n (%)           |                         |                         |       | 0.610    | 0.435  |
| Yes                  |                 | 30 (35.71)              | 8 (26.67)               |       |          |        |
| No                   |                 | 54 (64.29)              | 22 (73.33)              |       |          |        |
| Alcohol              | n (%)           |                         |                         |       | 2.530    | 0.092  |
| Yes                  |                 | 29 (34.52)              | 16 (53.33)              |       |          |        |
| No                   |                 | 55 (65.48)              | 9 (46.67)               |       |          |        |
| CrA                  | $\bar{X} \pm S$ | 15.45 $\pm$ 19.00       | 0.23 $\pm$ 0.38         | 6.963 |          | <0.001 |
| CrB                  | $\bar{X} \pm S$ | 9.45 $\pm$ 9.47         | 4.05 $\pm$ 1.87         | 3.215 |          | 0.018  |
| 8-OHdG<br>(ug/g Cre) | $\bar{X} \pm S$ | 43.76 $\pm$ 34.89       | 27.21 $\pm$ 13.76       | 3.354 |          | <0.001 |
| MNCC (%)             | M(Q)            | 6.00 (4.00)             | 3.20 (2.10)             | 2.420 |          | 0.004  |
| MNC (%)              | M(Q)            | 7.40 (4.47)             | 3.74 (2.94)             | 3.401 |          | 0.001  |
| NBUD (%)             | M(Q)            | 1.11 (1.20)             | 1.16 (1.17)             | 0.163 |          | 0.871  |
| NPB (%)              | M(Q)            | 1.28 (1.15)             | 1.42 (1.34)             | 0.476 |          | 0.635  |

Note: Smoking referred to suck at least one cigar per day and last one year or more, smoking quit but less than one year was also included. Alcohol was definitive by weekly drinking no less than three times

### Concentration of CrA and CrB

As was shown in [Figure Table 1](#), the concentration of CrA in chromate exposed group [(15.45  $\pm$  19.00)  $\mu\text{g}/\text{m}^3$ ] was much higher than that in control group [(0.23  $\pm$  0.38)  $\mu\text{g}/\text{m}^3$ ] ( $P < 0.001$ ), but—still under the exposure limitation of chromate

Formatted: Centered



1  
2  
3  
4  
5  
6 [(50 $\mu\text{g}/\text{m}^3$ ) (2012, ACGIH)]. The levels of CrB in chromate exposed group [(9.45  $\pm$   
7 9.47)  $\mu\text{g}/\text{L}$ ] were also significantly higher than that in control group [(4.05  $\pm$  1.87)  
8  $\mu\text{g}/\text{L}$ ] ( $P < 0.001$ ).  
9

### 10 11 *Levels of urinary 8-OHdG, and serum CBMN indexes*

12 ~~As for~~ the data distribution of indexes such as 8-OHdG, MNCC, MNC, NBUD  
13 and NPB ~~was shown in Table 1 (Table 1)~~, the ~~levels of re were three kinds of indexes~~  
14 ~~(8-OHdG, MNCC and MNC)~~. They were all significantly higher in chromate exposed  
15 group than that in control group ( $P < 0.05$ ), which showed that 8-OHdG, MNCC and  
16 MNC could be used as the genetic damage biomarkers ~~feasibly~~ caused by chromate  
17 exposure.  
18  
19

### 20 21 *Correlation*

22 As two biomarkers for genetic damage, there was a positive correlation between  
23 log (urinary 8-OHdG) and LnMNCC ~~and or~~ LnMNC ( $r = 0.377$  and  $r = 0.362$   
24 respectively) ( $P < 0.05$ ) (Figure 21).  
25

26 Correlation was also analyzed between the concentration of urinary 8-OHdG and  
27 CrB. As was recorded in Figure 2 and 3, there was no linear correlation but a curve  
28 fitting between CrB and Log (8-OHdG), ~~we found~~ the value of 8-OHdG was  
29 decreased when the concentration of CrB was more than 10.50  $\mu\text{g}/\text{L}$ . Based on the  
30 results above, the concentration of CrB was stratified into two groups: the high  
31 exposed group ( $\text{CrB} \geq 10.50 \mu\text{g}/\text{L}$ ) and the low exposed group ( $\text{CrB} < 10.50 \mu\text{g}/\text{L}$ ). A  
32 positive correlation was shown between CrB and log (8-OHdG) when the CrB Level  
33 was lower than 10.50  $\mu\text{g}/\text{L}$  ( $r = 0.355$ ,  $P < 0.05$ ), while there was a negative correlation  
34 between CrB and log (8-OHdG) when the CrB Level was higher than 10.50  $\mu\text{g}/\text{L}$ .  
35  
36  
37  
38  
39  
40  
41  
42  
43  
44

45 The relationship between the concentration of MNCC or MNC and CrB was also  
46 analyzed in this research (Figure 4 and 5). ~~there~~ There were no linear correlation but a  
47 curve fitting between CrB and LnMNCC or LnMNC. ~~We found~~ The value of MNCC  
48 or MNC was decreased when the concentration of CrB was more than 9.10  $\mu\text{g}/\text{L}$ .  
49 Based on the results above, the concentration of CrB was stratified into two groups:  
50 the high exposed group ( $\text{CrB} \geq 9.10 \mu\text{g}/\text{L}$ ) and the low exposed group (CrB  
51  
52  
53  
54  
55  
56  
57  
58  
59  
60

Formatted: Indent: First line: 1.5 ch

1  
2  
3  
4  
5  
6  
7  
8  
9  
10  
11  
12  
13  
14  
15  
16  
17  
18  
19  
20  
21  
22  
23  
24  
25  
26  
27  
28  
29  
30  
31  
32  
33  
34  
35  
36  
37  
38  
39  
40  
41  
42  
43  
44  
45  
46  
47  
48  
49  
50  
51  
52  
53  
54  
55  
56  
57  
58  
59  
60

<9.10µg/L). A positive correlation was shown between CrB and LnMNCC or LnMNC in higher chromate exposed group ( $r=0.365$  and  $r=0.269$  respectively,  $P<0.05$ ), while a significantly negative relationship was found between CrB and LnMNCC or LnMNC in the lower chromate exposed group ( $r=-0.279$  and  $r=-0.261$  respectively,  $P<0.05$ ).

### Discussion

Long-term and low level chromate exposure can not only increase the body's internal load but also cause a variety of harmful effects on workers' health even ~~increase~~ increasing the incidence of human cancer<sup>26, 27</sup>. In occupational activity, chromate could enter into workers' body mainly by respiratory system, then be metabolism and excreted by urine, so our previous researches have proved the concentration of ~~chromium~~ chromate in whole blood and urine can be used as the indicators to assess chromate biological exposure<sup>6, 28</sup>. In this study, it was found that the concentrations of CrA and CrB in exposed group were all significantly higher than that in control group ( $P<0.05$ ), while the CrB level in chromate exposed group was nine times more than that in the general population of our country (1.19 µg/L)<sup>29</sup>, which showed that the conclusion was credible by contrasting the genetic damage indexes between chromate exposed group and control group.

As we all known when Cr-VI enters human blood, it will be converted into other valence chromate compounds such as Cr-III, which could not only produce a large amount of ROS that can cause the redox system imbalance, but also directly or indirectly coordinate with DNA or protein. The transformation above can affect

1  
2  
3  
4  
5  
6  
7 genetic stability including oxidative DNA lesion, DNA cross-links, single and double  
8 strand breaks and so ~~on~~ <sup>28,30,31,32,29,30</sup> on. Besides, long-term chromate exposure can also  
9 cause cyto-toxicity to lead cells ~~apoptosis~~ <sup>31</sup> apoptosis <sup>33</sup>.

11 Urinary 8-OHdG has been demonstrated as a biomarker for oxidative DNA  
12 damage in chromate exposure not only by animal experiment but also by many  
13 epidemiological ~~researches~~ <sup>32</sup> researches <sup>34,33,35</sup>, because it is the site that ROS often  
14 attacks, but the dose-response relationship with occupational exposure indicators was  
15 not depicted clearly. Overall, in this research, the relationship between urinary  
16 8-OHdG and CrB was two-way changes. The concentration of urinary 8-OHdG was  
17 not significantly increasing when the level of CrB ~~is was~~ more than 10.50µg/L, which  
18 showed that ~~when the CrB was higher than some degree~~, the concentration of urinary  
19 8-OHdG would fail to predict the degree of DNA damage when the CrB was higher  
20 than some degree. There are some reasons for this result, firstly Sumner E.R has  
21 proved that oxidative DNA damage by chromate exposure mainly targets on  
22 specifically certain glycol tic enzymes on 8-~~OHdG~~ <sup>34</sup> OHdG <sup>36</sup>, which means once  
23 higher burden of CrB was produced, it could oxidize and change the structure of  
24 glycolytic enzymes to reduce the production of free 8-OHdG. secondly, some  
25 researchers have proved that 8-OHdG was not the final product of redox reaction, so  
26 when the level of CrB ~~is was~~ higher, 8-OHdG could be converted to these further  
27 oxidation products such as Spiroiminodihydantoin (Sp) <sup>35,37</sup>, so the concentration of free  
28 8-OHdG was reduced. Thirdly, as we all know, the kidney can be damaged by chronic  
29 chromate exposure. As the level of CrB increased, the kidney was at greater health  
30 risk, which ultimately affect the exertion of 8-OHdG in ~~urine~~ <sup>36</sup> urine <sup>38</sup>.

31  
32  
33  
34  
35  
36  
37  
38  
39  
40  
41  
42  
43  
44  
45 Micronuclei is another biomarker which commonly used as the genetic damage of  
46 chromate exposure <sup>39,40,39,40</sup>. Many researches showed that chromate exposure could  
47 cause the increasing of MN frequency in cell research, animals experiment, and  
48 human being <sup>41,42,41,42</sup>. In this research, the similar conclusion was proved that the MN  
49 frequency was significantly higher in chromate exposed group than that in control  
50 group and the general ~~population~~ <sup>41</sup> population <sup>43, 44</sup> ( $P<0.05$ ). The ~~frequency~~  
51 frequencies of MNCC and MNC (as the sensitive indexes of MN) ~~has have~~ statistical  
52  
53  
54  
55  
56  
57  
58  
59  
60

Formatted: Superscript

1  
2  
3  
4  
5  
6  
7  
8  
9  
10  
11  
12  
13  
14  
15  
16  
17  
18  
19  
20  
21  
22  
23  
24  
25  
26  
27  
28  
29  
30  
31  
32  
33  
34  
35  
36  
37  
38  
39  
40  
41  
42  
43  
44  
45  
46  
47  
48  
49  
50  
51  
52  
53  
54  
55  
56  
57  
58  
59  
60

differences between these two groups. However, the dose-response relationship with CrB still needs many further investigations, so this research was meaningful to discuss the suitable condition of MN as genetic damage. In this study, no linear correlation was shown between CrB and LnMNCC or LnMNC, the MN frequency did not increase as the CrB elevated. When all subjects were divided into two subgroups by the concentration of CrB, a positive correlation was shown between CrB and LnMNCC and LnMNC in high CrB group ( $\text{CrB} \geq 9.10 \mu\text{g/L}$ ) ( $r=0.365$  and  $r=0.269$  respectively), while a significantly inverse relationship was found between CrB with LnMNCC and LnMNC in low CrB group ( $\text{CrB} < 9.10 \mu\text{g/L}$ ) ( $r=-0.279$  and  $r=-0.261$  respectively). The reason for these results may be that the occupational chromate exposure can increase the frequency of the MN in some range. As the increasing of CrB, ~~more serious genotoxic damage should be caused the cytotoxic effect might play an important role and the cells with serious genetic damage may turn into apoptosis or necrosis, consequently which could lead to the false appearance of lower degree of MN such as the apoptosis or necrosis of lymphocyte, which contrarily decrease the frequency of MN in this situation~~<sup>425,43-46</sup>.

Both MN and urinary 8-OHdG can be used to predict different types of DNA damage in some range. A positive correlation between urinary 8-OHdG and MN was found, which suggested that these two indicators as genetic damage biomarker can be verified each other.

There was still some limitation in this study: the sample size of this study was not very large, especially the control group, so we chose some references<sup>38,43,44</sup> to give the value of 8-OHdG and MN in normal population to reduce the generation of bias. And it is necessary that more sample size epidemiological surveys in different chromate producing factories should be chosen to verify our conclusion.

Formatted: Indent: First line: 1 ch

Formatted: Font: Times New Roman

### ***Conclusions***

All these above had provided new insights that both MN and urinary 8-OHdG can be used as the genetic damage biomarkers caused by occupational chromate exposure at some levels. ~~The~~ The combination of these indicators can improve the credibility of the results. It is not the simple linear relationship between their concentration and the level of chromate exposure. Only when the level of CrB is below 9.10µg/L and 10.50µg/L, the MN frequency and urinary 8-OHdG can respectively show the degree of genetic damage ~~respectively produced by chromate exposure~~ quantitatively.

### ***Contributor ship statement***

All the authors included in the paper granted the criteria of the authorship. PL together with YG conceived and executed this investigation, analyzed of the data and described this manuscript. YL and JLY supported this investigation from the epidemiological aspect. GJ is responsible for the whole conduct of this study and all content of this. SFY contribute to the organization and arrangement for the scene investigation. All authors commented critically on the manuscript and agreed with this submitting.

### ***Competing interests***

There are not competing interests.

### ***Funding***

This work was supported by the project of National Natural Science Foundation of china [81073043 and 81072281] and the Doctor Fund of Ministry of Education of china (20120001110103).

## Data sharing

There is not data sharing.

## Reference

1. Monika Gube, Joachim Ebel, Peter Brand, et al. Biological effect markers in exhaled breath condensate and biomonitoring in welders: impact of smoking and protection equipment[J]. *Int Arch Occup Environ Health*, 2010, 83 (7): 803 – 811.
2. Andrea Caglieri, Matteo Goldoni, Olga Aeampa, et al. The effect of inhaled chromium on different exhaled breath condensate biomarkers among chrome-plating workers[J]. *Environmental Health Perspectives*, 2006, 114 (4): 542-546.
3. Shrivastava Rieha, Upreti RK, Seth PK, et al. Effects of chromium on the immune system[J]. *Immunology and Medical Microbiology*, 2002, 34 (4): 1-7.
4. Shashwat Katiyar, Awasthi SK, Srivastava JK. Effect of chromium on the level of IL-12 and IFN- $\gamma$  in occupationally exposed workers[J]. *Science of the total environment*, 2009, 407 (6): 1868-1874.
5. Mohammad BH, Marie Vahter, Gabriela Coneha, et al. Low level environmental cadmium exposure is associated with DNA hypomethylation in argentinean women[J]. *Environmental Health Perspectives*, 2012, 120 (6): 879 – 884.
6. Xiaohua L, Yanshuang S, Li W, Yuhui L, Ji Z, Yanhui M, Yun W, Wenjun M, Lei Y, Guang Jet al. Evaluation of the correction between genetic damage and occupational chromate exposure through BMMN frequenciess[J]. *J Occup Environ Med*, 2012, 54(2):166-170.–
7. De Flora S, Bagnasco M, Serra D, et al. Genotoxicity of chromium compounds: A review[J]. *Mutation Research/Reviews in Genetic Toxicology*, 1990, 238 (5): 99-172.
8. Wu LL, Chiou C-C, Chang P-Y, et al. Urinary 8-OHdG: a marker of oxidative stress to DNA and a risk factor for cancer, atherosclerosis and diabetes[J]. *Clinica Chimica Acta*, 2004, 339 (1-2): 1-9.
9. Ren C, Fang S, Wright RO, et al. Urinary 8-hydroxy-2-deoxyguanosine as a biomarker of oxidative DNA damage induced by ambient pollution in the Normative Aging Study[J]. *Occupational and environmental medicine*, 2011, 68 (2): 562-569.
10. Lin CY, Lee HL, Chen YC, et al. Positive association between urinary levels of 8-hydroxydeoxyguanosine and the acrylamide metabolite N-acetyl-S-(propionamide)-cysteine in adolescents and young adults[J]. *J Hazard Mater*, 2013, 261: 372-377.
11. Kim JY, Mukherjee S, Ngo LC, et al. Urinary 8-hydroxy-2'-deoxyguanosine as a biomarker of oxidative DNA damage in workers exposed to fine particulates[J]. *Environmental health perspectives*, 2004, 112 (6): 666-671.
12. Valavanidis A, Loridas S, Vlahogianni T, et al. Influence of ozone on traffic-related particulate matter on the generation of hydroxyl radicals through a heterogeneous synergistic effect[J]. *J Hazard Mater*. 2009, 162 (2-3): 886-892.
13. Valavanidis A, Vlachogianni T, Fiotakis C. 8-hydroxy-2-deoxyguanosine (8-OHdG): a critical biomarker of oxidative stress and carcinogenesis[J]. *Journal of environmental science and health Part C*, 2009, 27 (2): 120-139.
14. M-Fenech M, M-Kirsch-Volders L, M-A-T-Natarajan AT, et al. Molecular mechanisms of micronucleus, nucleoplasmic bridge and nuclear bud formation in mammalian and human cells. *Mutagenesis*, 2011, 26: 125 – 132.
15. Sobol Z, Schiestl RH. Intracellular and extracellular factors influencing Cr (VI) and Cr (III) genotoxicity[J]. *Environmental and Molecular Mutagenesis*, 2012, 53 (2): 94-100.
16. Kuo H, Chang S, Wu K, et al. Chromium (VI) induced oxidative damage to DNA: increase of urinary 8-hydroxydeoxyguanosine concentrations (8-OHdG) among electroplating workers[J]. *Occupational and environmental medicine*, 2003, 60 (8): 590-594.
17. Kim H, Cho S-H, Chung M-H. Exposure to hexavalent chromium does not increase 8-hydroxydeoxyguanosine levels in Korean chromate pigment workers[J]. *Industrial health*, 1999, 37 (3): 335-341.
18. Gao M, Levy LS, Faux SP, et al. Use of molecular epidemiological techniques in a pilot study

- on workers exposed to chromium[J]. Occupational and environmental medicine, 1994, 51 (10): 663-668.
19. Zhang XH, Zhang X, Wang XC, et al. Chronic occupational exposure to hexavalent chromium causes DNA damage in electroplating workers.[J] BMC Public Health, 2011, 11 (3): 224.
  20. Xiaohua L, Yanshuang S, Li W, et al. Evaluation of the correction between genetic damage and occupational chromate exposure through BMMN frequencies. J Occup Environ Med 2012, 54 (2): 166-170.
  21. Danadevi K, Rozati R, Banu BS, et al. Genotoxic evaluation of welders occupationally exposed to chromium and nickel using the Comet and micronucleus assays[J]. Mutagenesis, 2004, 19 (1): 35-41.
  22. Thompson CM, Fedorov Y, Brown DD, et al. Assessment of Cr (VI)-induced cytotoxicity and genotoxicity using high content analysis[J]. PloS one, 2012, 7 (8): 742-720.
  23. [GBZ 159-2004. Specifications of air sampling for hazardous substances monitoring in the workplace. China.](#)
  24. [Yanshuang Song, Ji Zhang, Shanfa Yu, Tiancheng Wang, Xiaoxing Cui, Xianmei Dua and Guang Jia. Effects of chronic chromium \(VI\) exposure on blood element homeostasis: An epidemiological study. Metallomics, 2012, 4: 463-472](#)
  - 24-25. [Fenech M. Cytokinesis-block micronucleus cytochrome assay\[J\]. Nature protocols, 2007, 2 \(1\): 1084-1104](#)
  26. Clancy HA, Sun H, Passantino L, et al. Gene expression changes in human lung cells exposed to arsenic, chromium, nickel or vanadium indicate the first steps in cancer[J]. Metallomics. 2012, 4(8):784-793.
  27. Chhabra D, Oda K, Jagannath P, et al. Chronic heavy metal exposure and bladder cancer risk in India, a comparative study with Japan[J]. Asian Pacific Journal of Cancer Prevention. 2012, 13(1): 187-190.
  28. [Yan L, Jia G, Zhang J, He PP, Wang TC, Zhang N, Liu LZ, Li GR, Wang X, Wang L. The correlation between personal occupational exposure to soluble chromate and urinary chromium content. Zhonghua yu Fang yi xue za zhi \(Chinese Journal of Preventive Medicine\) 2006, 40\(6\): 386-389 \(Article in Chinese\).](#)
  26. [Yan L, Jia G, Zhang J, He PP, Wang TC, Zhang N, Liu LZ, Li GR, Wang X, Wang L. The correlation between personal occupational exposure to soluble chromate and urinary chromium content. Zhonghua yu Fang yi xue za zhi \(Chinese Journal of Preventive Medicine\) 2006, 40\(6\): 386-389 \(Article in Chinese\).](#)
  29. Ding CG, Pan Yj, Zhang AH, et al. Distribution of chromium in whole blood and urine among general population in China between year 2009 and 2010. Zhonghua yu Fang yi xue za zhi (Chinese Journal of Preventive Medicine) 2012, 46(8): 679-682. (Article in Chinese).
  30. Zhitkovich, A. Importance of chromium-DNA adducts in mutagenicity and toxicity of chromium(VI)[J]. Chem. Res. Toxicol., 2005, 18 (1): 3-11.
  31. Wang TC, Song YS, Wang H, et al. Oxidative DNA damage and global DNA hypomethylation are related to folate deficiency in chromate manufacturing workers[J]. Journal of Hazardous Materials, 2012, 213.214:440-446.
  32. Brien, T.J.; Ceryak, S.; Patierno, S.R. Complexities of chromium carcinogenesis: role of cellular response, repair and recovery mechanisms[J]. Mutat. Res. Fundam. Mol. Mech. Mutagen., 2003, 533 (14): 3-36.
  33. Martini CN, Brandani JN, Gabrielli M, et al. Effect of hexavalent chromium on proliferation and differentiation to adipocytes of 3T3-L1 fibroblasts[J]. Toxicol In Vitro, 2014 28(4):700-706.
  34. Goulart M, Batoreu M, Rodrigues A, et al. Lipoperoxidation products and thiol antioxidants in chromium exposed workers[J]. Mutagenesis, 2005, 20 (5): 311-315.
  35. Khan FH, Ambreen K, Fatima G, et al. Assessment of health risks with reference to oxidative stress and DNA damage in chromium exposed population[J]. Science of the Total Environment, 2012, 430 (2): 68-74.
  36. Sumner ER, Shanmuganathan A, Sideri TC, et al. Oxidative protein damage causes chromium toxicity in yeast[J]. Microbiology, 2005, 151: 1939-1948.
  37. Steenken S, Jovanovic SV, Bietti M, et al. The trap depth (in DNA) of 8-oxo-7, -8-dihydro-2'

Formatted: Indent: Left: 0", Hanging: 0.15"

Formatted: Font: 10.5 pt

Formatted: First line: 0 ch, Numbered + Level: 1 + Numbering Style: 1, 2, 3, ... + Start at: 23 + Alignment: Left + Aligned at: 0" + Indent at: 0"

Formatted: Font: Times New Roman, 10.5 pt

Formatted: Font: 10.5 pt

Formatted: Font: 10.5 pt

Formatted: Indent: Left: 0", First line: 0 ch

Formatted: Indent: Left: 0", First line: 0 ch

Formatted: Font: Times New Roman, Font color: Auto

- deoxyguanosine as derived from electron-transfer equilibria in aqueous solution[J]. Journal of the American Chemical Society, 2000, 122 (10): 2373-2374.
38. Wang T, Jia G, Zhang J, et al. Renal Impairment Caused by Chronic Occupational Chromate Exposure[J]. Int Arch Occ Env Hea, 2011, 84 (4):393 - 401.
39. Urbano AM, Ferreira LM, Alpoim MC. Molecular and cellular mechanisms of hexavalent chromium-induced lung cancer: an updated perspective[J]. Curr Drug Metab, 2012, 13 (3): 284-305.
40. de Lemos CT, Rödel PM, Terra NR, et al. Evaluation of basal micronucleus frequency and hexavalent chromium effects in fish erythrocytes[J]. Environmental toxicology and chemistry, 2001, 20 (6): 1320-1324.
41. Reynolds M, Armknecht S, Johnston T, et al. Undetectable role of oxidative DNA damage in cell cycle, cytotoxic and clastogenic effects of Cr(VI) in human lung cells with restored ascorbate levels[J]. Mutagenesis, 2012, 27 (4): 437-443.
42. Bagchi D, Stohs SJ, Downs BW, et al. Cytotoxicity and oxidative mechanisms of different forms of chromium[J]. Toxicology, 2002, 180 (1): 5-22.
43. The HUMN and HUMNxL international collaboration projects on human micronucleus assays in lymphocytes and buccal cells—past, present and future. Mutagenesis, 2011, 10 (1): 239–245.
44. Bonassi S, Fenech M, Lando C, et al. Human MicroNucleus Project: International database. Comparison for results with the cytokinesis-block micronucleus assay in human lymphocytes: effect of laboratory protocol, scoring criteria, and host factors on the frequency of micronuclei. Environ Mol Mutagen.2001;37:31–45
45. Vasylykiv OY, Kubrak OI, Storey KB, et al. Cytotoxicity of chromium ions may be connected with induction of oxidative stress[J]. Chemosphere, 2010, 80 (9): 1044-1049.
46. Arakawa H, Tang MS. Recognition and incision of Cr(III) ligand-conjugated DNA adducts by the nucleotide excision repair proteins UvrABC: importance of the Cr(III)-purine moiety in the enzymatic reaction[J]. Chem Res Toxicol, 2008, 21 (6): 1284-1289.

**Figure 1 Correlation between LnMNCC or LnMNC with Lg (concentration of 8-OHdG in urine) in chromate exposed group**

**Figure 2 Correlation between urinary 8-OHdG and CrB in chromate exposed group**

**Figure 3 a showed the correlation between urinary 8-OHdG and CrB in higher chromate exposed group (CrB>10.50). b showed the the linear relationship between urinary 8-OHdG and CrB in lower chromate exposed group(CrB<10.50).**

**Figure 4 Correlation between LnMNC or LnMNCC and CrB in chromate exposed group**

**Figure 5 a showed the correlation between LnMNC or LnMNCC and CrB in higher chromate exposed group (CrB>10.50). b showed the the linear relationship between LnMNC or LnMNCC and CrB in lower chromate exposed group(CrB<10.50)**

Formatted: Indent: First line: 1.5 ch

Formatted: Indent: Left: 0.22"

Formatted: Endnote Text, Indent: Left 1 ch, First line: 0.5 ch

Formatted: Line spacing: single



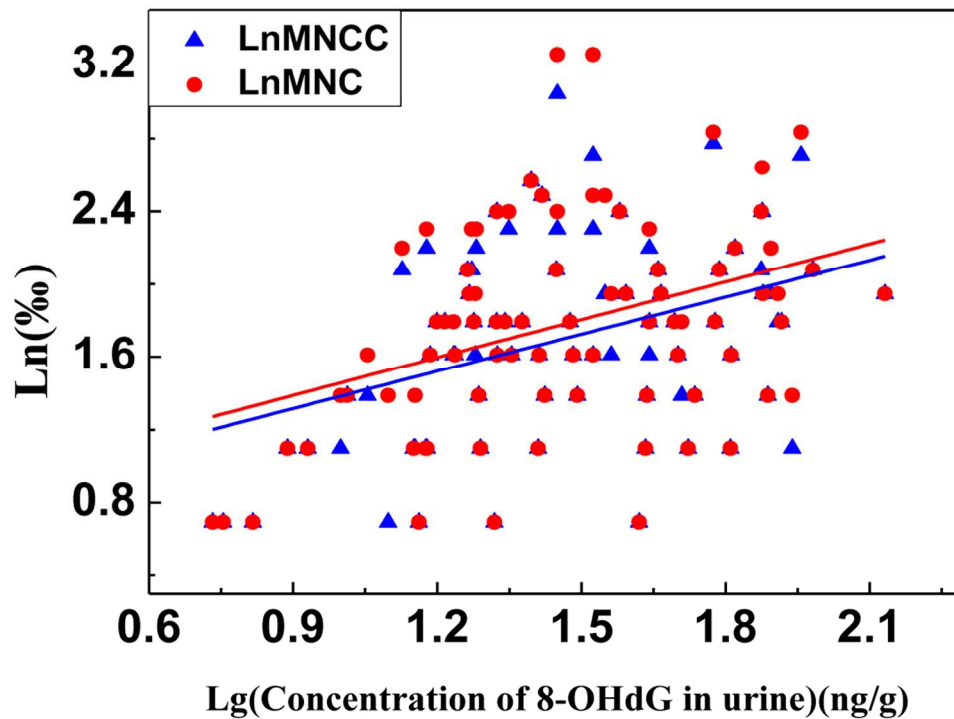

Figure1 Correlation between LnMNCC or LnMNC with Lg (concentration of 8-OHdG in urine) in chromate exposed group  
173x140mm (300 x 300 DPI)

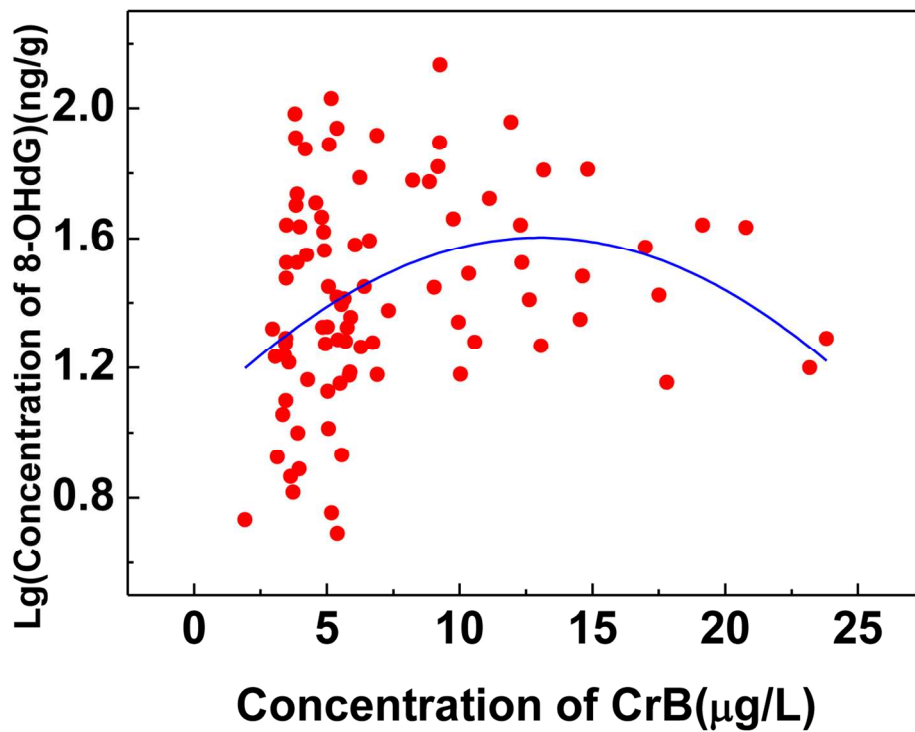

Figure 2 Correlation between urinary 8-OHdG and CrB in chromate exposed group  
173x140mm (300 x 300 DPI)

Peer Review Only

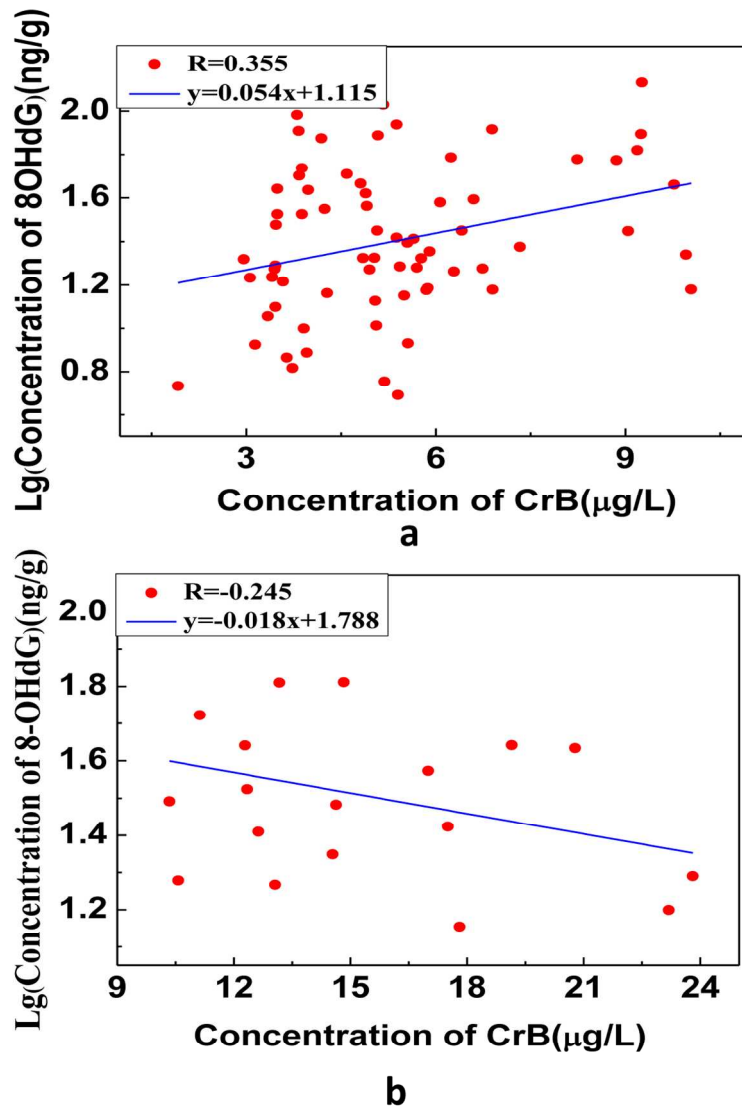

Figure 3 a showed the correlation between urinary 8-OHdG and CrB in higher chromate exposed group ( $\text{CrB} \geq 10.50$ ). b showed the the linear relationship between urinary 8-OHdG and CrB in lower chromate exposed group ( $\text{CrB} < 10.50$ )  
173x230mm (300 x 300 DPI)

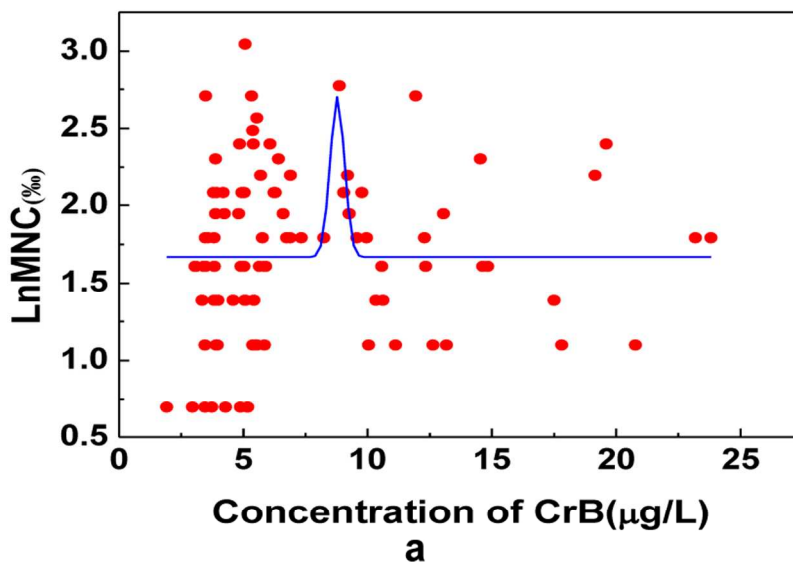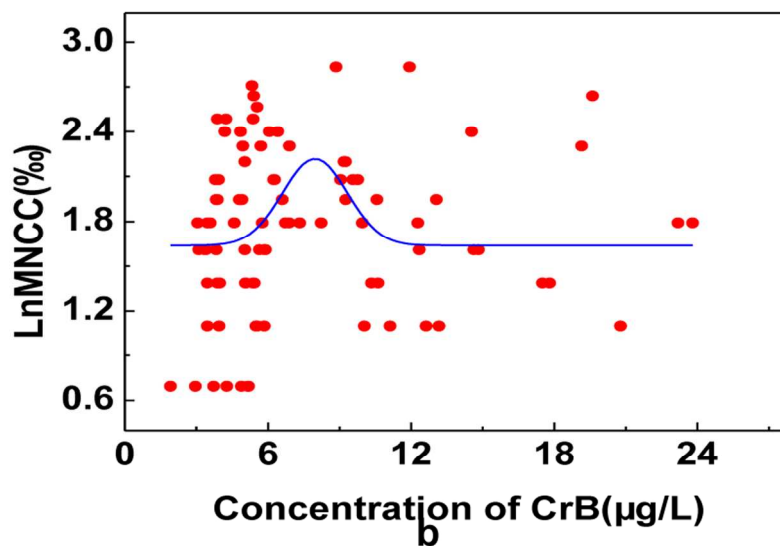

Figure 4 Correlation between LnMNC or LnMNCC and CrB in chromate exposed group  
173x230mm (300 x 300 DPI)

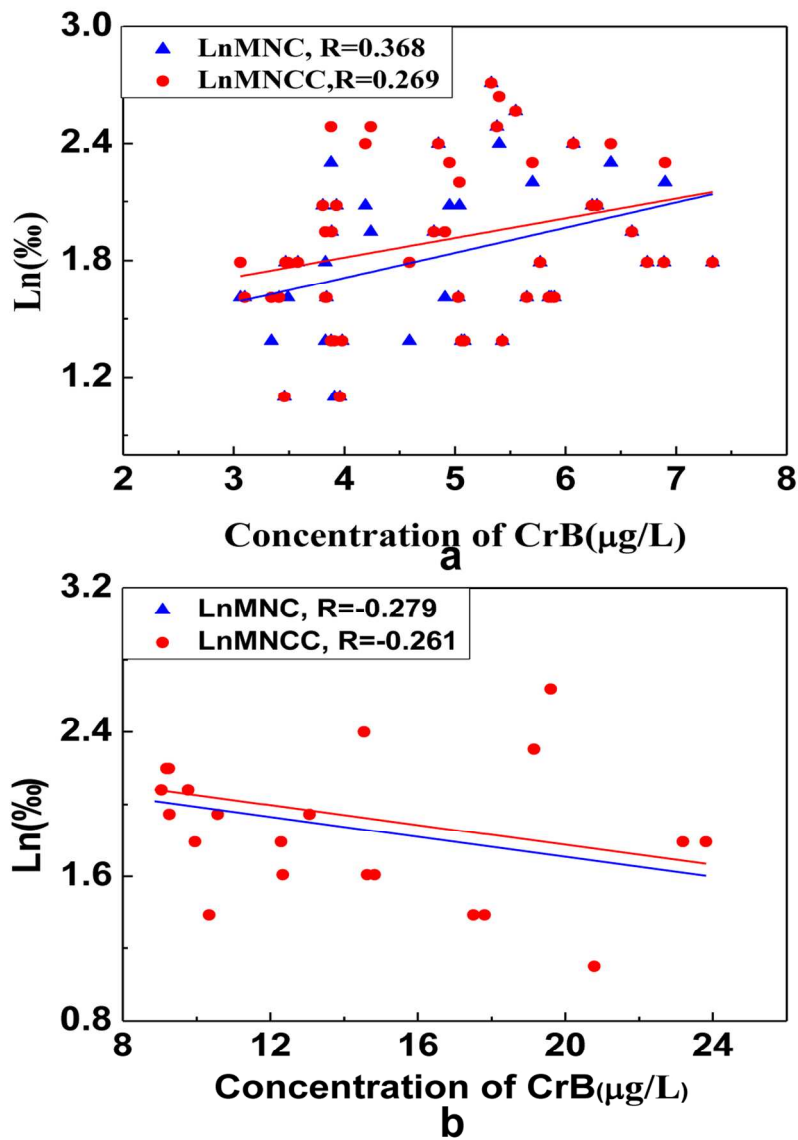

Figure 5 a showed the correlation between LnMNC or LnMNCC and CrB in higher chromate exposed group ( $\text{CrB} \geq 10.50$ ). b showed the the linear relationship between LnMNC or LnMNCC and CrB in lower chromate exposed group ( $\text{CrB} < 10.50$ )  
 173x230mm (300 x 300 DPI)
